# Supplementary material for: Benchmarking quantum chemical methods for accurate gas-phase structure predictions of carbonyl compounds: the case of ethyl butyrate
Source: Royal Society of Chemistry journal article supplement (doi:10.1039/d2cp05774c), 2023-01-01
Supplement: d2cp05774c1.pdf [file d2cp05774c1.pdf]

# Supplementary Material

## Benchmarking quantum chemical methods for accurate gas-phase structure predictions of carbonyl compounds:

### The case of ethyl butyrate

Lilian W. Sutikdja<sup>a</sup>, Ha Vinh Lam Nguyen<sup>†b,c</sup>, Dragan Jelisavac<sup>a</sup>,

Wolfgang Stahl<sup>a††</sup> and Halima Mouhib<sup>†d</sup>

---

<sup>a</sup> *Institute of Physical Chemistry, RWTH Aachen University, Landoltweg 2, D-52074 Aachen, Germany.*

<sup>b</sup> *Univ Paris Est Creteil and Université Paris Cité, CNRS, LISA, F-94010 Créteil, France.*

<sup>c</sup> *Institut Universitaire de France (IUF), F-75231 Paris cedex 05, France*

<sup>d</sup> *Department of Computer Science, VU Bioinformatics, Vrije Universiteit Amsterdam, De Boelelaan 1111, 1081 HV Amsterdam, The Netherlands*

† Corresponding authors. Emails: [lam.nguyen@lisa.ipsl.fr](mailto:lam.nguyen@lisa.ipsl.fr) and [h.mouhib@vu.nl](mailto:h.mouhib@vu.nl).

†† Deceased.

**Table S-1.** The rotational constants  $A$ ,  $B$ ,  $C$  (in GHz), the dipole moment components  $\mu_a$ ,  $\mu_b$ ,  $\mu_c$  (in Debye), and energies  $E_{\text{rel.}}$  (in  $\text{kJ}\cdot\text{mol}^{-1}$ ) relative to  $E = -385.3378749$  Hartree of the 14 conformers of ethyl butyrate predicted at the MP2/6-311++G(d,p) level level of theory.

| Conf.                      | Notation | $A$          | $B$          | $C$          | $ \mu_a $ | $ \mu_b $ | $ \mu_c $ | $E_{\text{rel.}}$ |
|----------------------------|----------|--------------|--------------|--------------|-----------|-----------|-----------|-------------------|
| I                          | Maa      | 4.572        | 0.941        | 0.916        | -0.63     | -1.66     | 0.61      | 0                 |
| II                         | MaP      | 3.722        | 1.130        | 1.047        | -0.25     | -0.21     | -1.67     | 0.62              |
| III                        | PPa      | 3.082        | 1.200        | 1.035        | 0.20      | -2.08     | -0.98     | 0.73              |
| IV                         | MPa      | 3.085        | 1.199        | 1.035        | -0.20     | -2.08     | -0.98     | 0.73              |
| V                          | MaM      | 5.033        | 0.980        | 0.971        | 0.37      | -0.05     | -1.66     | 0.74              |
| VI                         | PPP      | 2.999        | 1.335        | 1.185        | 0.32      | 1.17      | -1.75     | 0.89              |
| VII                        | MPM      | 2.999        | 1.335        | 1.184        | -0.32     | 1.17      | -1.75     | 0.89              |
| VIII                       | PPM      | 4.012        | 1.114        | 1.057        | 0.25      | -1.80     | 1.06      | 1.52              |
| IX                         | MPP      | 4.011        | 1.114        | 1.057        | -0.25     | -1.80     | 1.06      | 1.53              |
| X                          | aaa      | 6.333        | 0.806        | 0.731        | -0.47     | 0.00      | 0.00      | 2.29              |
| XI                         | aPa      | 3.949        | 0.945        | 0.816        | 0.06      | -2.19     | 0.36      | 2.67              |
| XII                        | aPP      | 3.920        | 1.004        | 0.931        | 0.42      | -1.73     | 1.07      | 2.89              |
| XIII                       | aaP      | 6.068        | 0.851        | 0.811        | -0.46     | -1.83     | -0.02     | 2.90              |
| XIV                        | aPM      | 5.302        | 0.908        | 0.847        | 0.41      | -1.96     | 0.37      | 3.54              |
| <b>Expt. C<sub>1</sub></b> |          | <b>5.238</b> | <b>0.904</b> | <b>0.869</b> |           |           |           |                   |
| <b>Expt. C<sub>s</sub></b> |          | <b>6.328</b> | <b>0.807</b> | <b>0.732</b> |           |           |           |                   |

**Conformer I:**

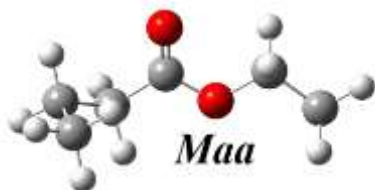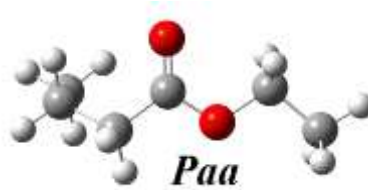

**Conformer II:**

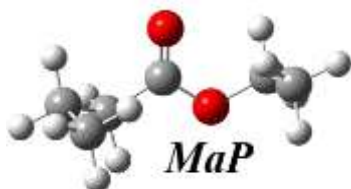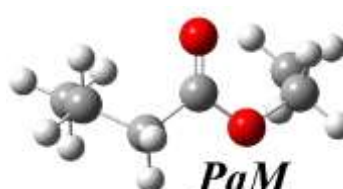

**Conformer III:**

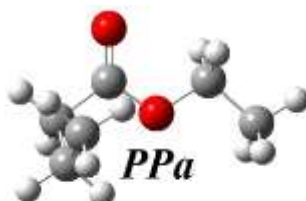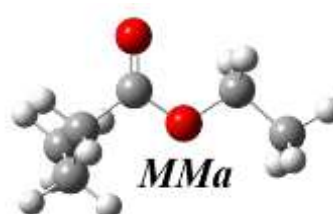

Conformer IV:

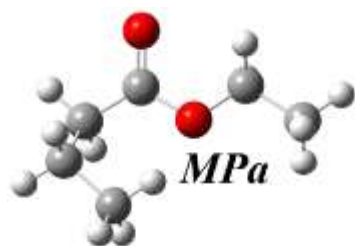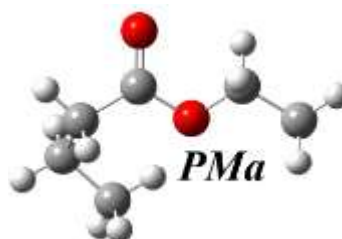

Conformer V:

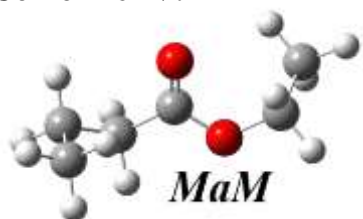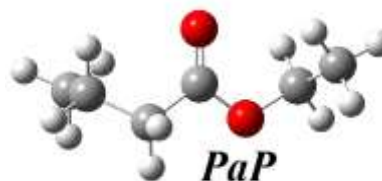

Conformer VI:

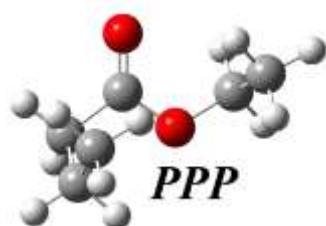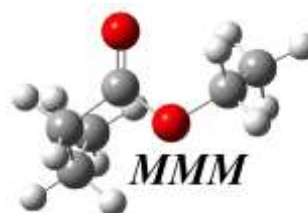

Conformer VII:

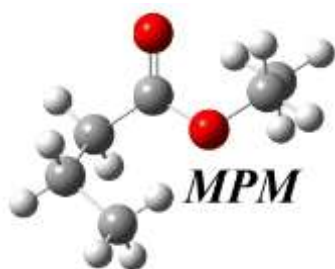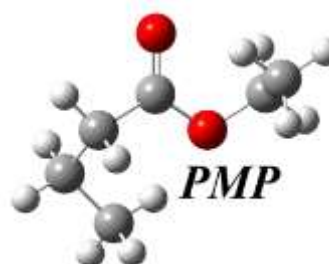

Conformer VIII:

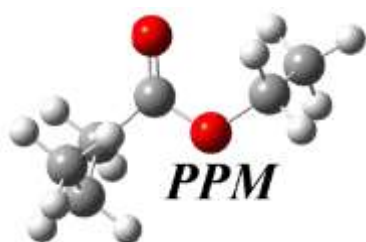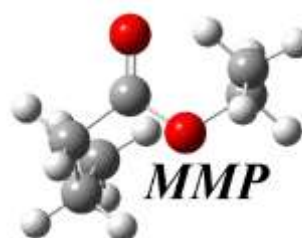

Conformer IX:

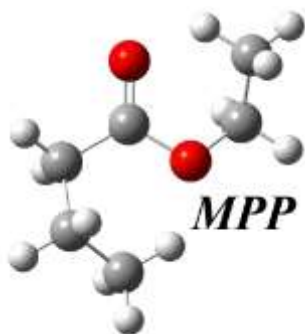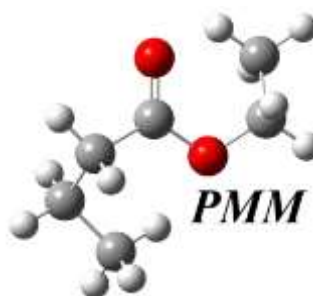

Conformer X:

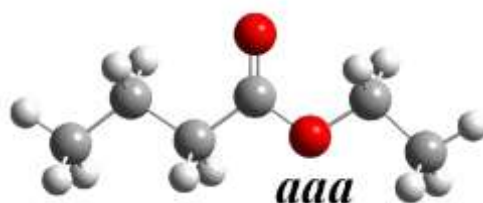

Conformer XI:

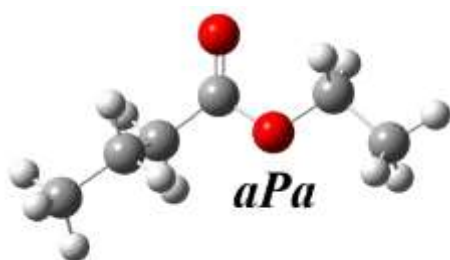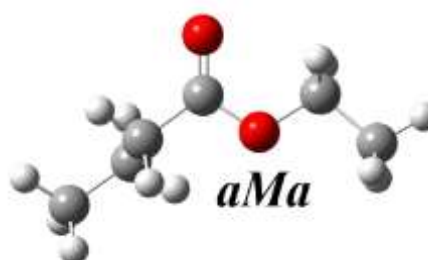

Conformer XII:

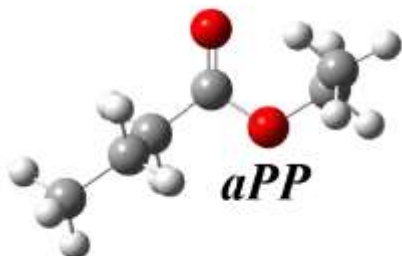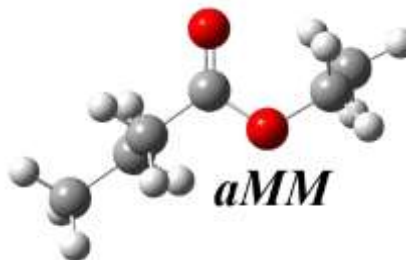

Conformer XIII:

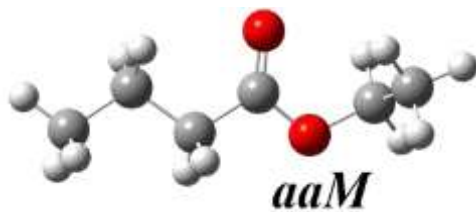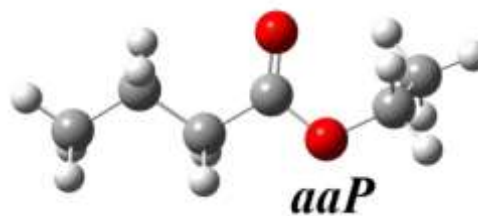

Conformer XIV:

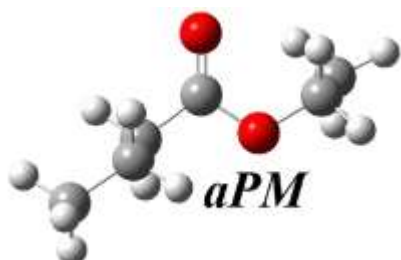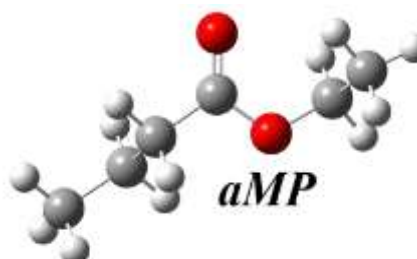

**Table S-2a.** Geometry parameters in the principal axes of inertia of the two observed conformers Maa and aaa of ethyl butyrate calculated at the MP2/6-311++G(d,p) level of theory. The atoms are numbered according to Figure 1.

|     | Conformer Maa    |                  |                  | Conformer aaa    |                  |                  |
|-----|------------------|------------------|------------------|------------------|------------------|------------------|
|     | $a / \text{\AA}$ | $b / \text{\AA}$ | $c / \text{\AA}$ | $a / \text{\AA}$ | $b / \text{\AA}$ | $c / \text{\AA}$ |
| C1  | 0.100084         | 0.355162         | 0.287577         | -0.051775        | 0.312215         | 0.000079         |
| O2  | 0.187770         | 1.463707         | -0.198127        | -0.074327        | 1.524901         | 0.000037         |
| O3  | -1.043569        | -0.366838        | 0.298279         | -1.166471        | -0.456142        | 0.000069         |
| C4  | 1.225530         | -0.383047        | 0.977053         | 1.190868         | -0.548272        | 0.000194         |
| H5  | 1.216747         | -0.054910        | 2.024099         | 1.142067         | -1.205586        | 0.876760         |
| H6  | 1.007515         | -1.455051        | 0.970595         | 1.141857         | -1.206180        | -0.875910        |
| C7  | 2.579968         | -0.083778        | 0.333446         | 2.479906         | 0.266829         | -0.000217        |
| H8  | 3.366529         | -0.530951        | 0.951147         | 2.488264         | 0.922749         | -0.876447        |
| H9  | 2.739669         | 0.998739         | 0.332315         | 2.488435         | 0.923358         | 0.875553         |
| C10 | 2.671068         | -0.624841        | -1.093831        | 3.716713         | -0.631476        | -0.000031        |
| H11 | 1.917414         | -0.158963        | -1.735809        | 4.635240         | -0.037814        | -0.000336        |
| H12 | 3.653041         | -0.420432        | -1.530155        | 3.732117         | -1.275683        | 0.885291         |
| H13 | 2.513078         | -1.708591        | -1.108786        | 3.731933         | -1.276308        | -0.884902        |
| C14 | -2.182266        | 0.294512         | -0.294067        | -2.409042        | 0.278007         | 0.000015         |
| H15 | -2.370371        | 1.225900         | 0.247111         | -2.440553        | 0.919667         | 0.884836         |
| H16 | -1.943346        | 0.547767         | -1.330468        | -2.440407        | 0.919788         | -0.884720        |
| C17 | -3.350907        | -0.662906        | -0.199544        | -3.528132        | -0.741349        | -0.000145        |
| H18 | -3.564403        | -0.909620        | 0.843045         | -3.472814        | -1.375199        | 0.887880         |
| H19 | -4.240466        | -0.199762        | -0.636360        | -4.493226        | -0.226294        | -0.000169        |
| H20 | -3.137768        | -1.586387        | -0.742829        | -3.472691        | -1.375054        | -0.888267        |

**Table S-2b.** Geometry parameters in the principal axes of inertia of the two observed conformers Maa and aaa of ethyl butyrate calculated at the MP2/cc-pVDZ level of theory. The atoms are numbered according to Figure 1.

| Conformer Maa |                  |                  | Conformer aaa    |                  |                  |                  |
|---------------|------------------|------------------|------------------|------------------|------------------|------------------|
|               | $a / \text{\AA}$ | $b / \text{\AA}$ | $c / \text{\AA}$ | $a / \text{\AA}$ | $b / \text{\AA}$ | $c / \text{\AA}$ |
| C1            | -0.079734        | 0.097693         | -0.295994        | -0.053269        | 0.307366         | -0.000330        |
| O2            | -0.226350        | 1.295108         | -0.456839        | -0.071694        | 1.523666         | 0.000116         |
| O3            | 1.113547         | -0.482216        | -0.011948        | -1.170542        | -0.464045        | -0.000198        |
| C4            | -1.170106        | -0.949745        | -0.410335        | 1.190734         | -0.556577        | -0.000095        |
| H5            | -0.997956        | -1.481618        | -1.364150        | 1.138841         | -1.222285        | 0.880658         |
| H6            | -1.020982        | -1.696734        | 0.388433         | 1.139002         | -1.222518        | -0.880675        |
| C7            | -2.573346        | -0.343242        | -0.364507        | 2.477934         | 0.264554         | -0.000059        |
| H8            | -3.305400        | -1.122848        | -0.639176        | 2.479703         | 0.929294         | -0.881024        |
| H9            | -2.640001        | 0.450675         | -1.127771        | 2.479491         | 0.929548         | 0.880713         |
| C10           | -2.919914        | 0.232623         | 1.010641         | 3.724928         | -0.620877        | 0.000214         |
| H11           | -2.225351        | 1.044702         | 1.278915         | 4.645632         | -0.015080        | 0.000228         |
| H12           | -3.942563        | 0.644341         | 1.023233         | 3.748957         | -1.271954        | 0.891122         |
| H13           | -2.860856        | -0.547650        | 1.789753         | 3.749159         | -1.272221        | -0.890492        |
| C14           | 2.219638         | 0.443438         | 0.067643         | -2.407011        | 0.281999         | 0.000091         |
| H15           | 2.315100         | 0.978140         | -0.892333        | -2.437467        | 0.933952         | 0.889209         |
| H16           | 2.006793         | 1.195866         | 0.845383         | -2.437759        | 0.934145         | -0.888875        |
| C17           | 3.455368         | -0.373628        | 0.389392         | -3.533318        | -0.732710        | 0.000168         |
| H18           | 3.641605         | -1.120710        | -0.397988        | -3.476596        | -1.374041        | 0.893628         |
| H19           | 4.334776         | 0.286581         | 0.462192         | -4.506417        | -0.215423        | 0.000389         |
| H20           | 3.332005         | -0.900784        | 1.348390         | -3.476896        | -1.373841        | -0.893454        |

**Table S-3.** The rotational constants  $A$ ,  $B$ ,  $C$  (in MHz) of conformer Maa of ethyl butyrate calculated at different levels of theory and their deviations to the experimental values (calc.–exp.)  $\Delta A$ ,  $\Delta B$ , and  $\Delta C$ , respectively (in MHz). The  $\Theta$  angle (in degree) is also given.

| Level of theory            | $A$    | $\Delta A$ | $B$   | $\Delta B$ | $C$   | $\Delta C$ | $\Theta$ |
|----------------------------|--------|------------|-------|------------|-------|------------|----------|
| B3LYP/6-31G(d,p)           | 5291.8 | 53.7       | 891.1 | -12.7      | 853.2 | -16.1      | 16.0     |
| B3LYP/6-31+G(d,p)          | 4992.8 | -245.3     | 893.3 | -10.5      | 863.8 | -5.5       | 23.5     |
| B3LYP/6-31++G(d,p)         | 5012.6 | -225.5     | 892.4 | -11.4      | 862.5 | -6.8       | 23.0     |
| B3LYP/6-311G(d,p)          | 5373.7 | 135.6      | 888.0 | -15.8      | 848.4 | -20.9      | 14.1     |
| B3LYP/6-311+G(d,p)         | 5071.4 | -166.7     | 892.9 | -10.9      | 862.2 | -7.1       | 22.0     |
| B3LYP/6-311++G(d,p)        | 5079.9 | -158.2     | 892.7 | -11.1      | 861.7 | -7.6       | 21.8     |
| B3LYP/6-311G(2d,2p)        | 5427.3 | 189.2      | 889.2 | -14.6      | 849.3 | -20.0      | 13.5     |
| B3LYP/6-311+G(2d,2p)       | 5160.0 | -78.1      | 892.9 | -10.9      | 860.8 | -8.5       | 20.4     |
| B3LYP/6-311++G(2d,2p)      | 5159.9 | -78.2      | 892.9 | -10.9      | 860.8 | -8.5       | 20.4     |
| B3LYP/6-311G(df,pd)        | 5378.3 | 140.2      | 890.6 | -13.2      | 851.2 | -18.1      | 14.3     |
| B3LYP/6-311+G(df,pd)       | 5077.4 | -160.7     | 895.5 | -8.3       | 864.9 | -4.4       | 22.3     |
| B3LYP/6-311++G(df,pd)      | 5077.5 | -160.6     | 895.6 | -8.2       | 864.9 | -4.4       | 22.2     |
| B3LYP/6-311G(2df,2pd)      | 5449.8 | 211.7      | 889.5 | -14.3      | 848.7 | -20.6      | 12.9     |
| B3LYP/6-311+G(2df,2pd)     | 5179.6 | -58.5      | 893.2 | -10.6      | 860.3 | -9.0       | 20.0     |
| B3LYP/6-311++G(2df,2pd)    | 5178.8 | -59.3      | 893.2 | -10.6      | 860.4 | -8.9       | 20.0     |
| B3LYP/6-311G(3df,3pd)      | 5410.6 | 172.5      | 890.3 | -13.5      | 850.6 | -18.7      | 14.0     |
| B3LYP/6-311+G(3df,3pd)     | 5147.3 | -90.8      | 894.8 | -9.0       | 863.0 | -6.3       | 20.9     |
| B3LYP/6-311++G(3df,3pd)    | 5145.6 | -92.5      | 894.9 | -8.9       | 863.1 | -6.2       | 21.0     |
| B3LYP/cc-pVDZ              | 5404.6 | 166.5      | 886.9 | -16.9      | 845.4 | -23.9      | 12.6     |
| B3LYP/aug-cc-pVDZ          | 5127.7 | -110.4     | 889.8 | -14.0      | 857.3 | -12.0      | 20.5     |
| B3LYP/cc-pVTZ              | 5270.1 | 32.0       | 891.3 | -12.5      | 855.8 | -13.5      | 17.5     |
| B3LYP/aug-cc-pVTZ          | 5155.6 | -82.5      | 893.3 | -10.5      | 861.0 | -8.3       | 20.5     |
| B3LYP-D3/6-31G(d,p)        | 5352.3 | 114.2      | 896.7 | -7.1       | 855.5 | -13.8      | 14.0     |
| B3LYP-D3/6-31+G(d,p)       | 5095.6 | -142.5     | 897.5 | -6.3       | 865.1 | -4.2       | 20.7     |
| B3LYP-D3/6-31++G(d,p)      | 5114.8 | -123.3     | 896.8 | -7.0       | 863.8 | -5.5       | 20.2     |
| B3LYP-D3/6-311G(d,p)       | 5439.0 | 200.9      | 893.8 | -10.0      | 850.7 | -18.6      | 12.1     |
| B3LYP-D3/6-311+G(d,p)      | 5165.3 | -72.8      | 897.7 | -6.1       | 864.0 | -5.3       | 19.3     |
| B3LYP-D3/6-311++G(d,p)     | 5166.1 | -72.0      | 897.7 | -6.1       | 863.9 | -5.4       | 19.3     |
| B3LYP-D3/6-311G(2d,2p)     | 5466.9 | 228.8      | 895.4 | -8.4       | 852.8 | -16.5      | 12.1     |
| B3LYP-D3/6-311+G(2d,2p)    | 5231.8 | -6.3       | 898.3 | -5.5       | 863.4 | -5.9       | 18.3     |
| B3LYP-D3/6-311++G(2d,2p)   | 5230.7 | -7.4       | 898.3 | -5.5       | 863.5 | -5.8       | 18.3     |
| B3LYP-D3/6-311G(df,pd)     | 5444.1 | 206.0      | 896.3 | -7.5       | 853.4 | -15.9      | 12.3     |
| B3LYP-D3/6-311+G(df,pd)    | 5170.5 | -67.6      | 900.2 | -3.6       | 866.7 | -2.6       | 19.7     |
| B3LYP-D3/6-311++G(df,pd)   | 5166.7 | -71.4      | 900.4 | -3.4       | 866.9 | -2.4       | 19.7     |
| B3LYP-D3/6-311G(2df,2pd)   | 5485.4 | 247.3      | 895.8 | -8.0       | 852.5 | -16.8      | 11.6     |
| B3LYP-D3/6-311+G(2df,2pd)  | 5251.1 | 13.0       | 898.7 | -5.1       | 863.0 | -6.3       | 17.9     |
| B3LYP-D3/6-311++G(2df,2pd) | 5249.4 | 11.3       | 898.7 | -5.1       | 863.1 | -6.2       | 17.9     |
| B3LYP-D3/6-311G(3df,3pd)   | 5456.0 | 217.9      | 896.5 | -7.3       | 854.0 | -15.3      | 12.5     |
| B3LYP-D3/6-311+G(3df,3pd)  | 5226.2 | -11.9      | 900.1 | -3.7       | 865.4 | -3.9       | 18.6     |
| B3LYP-D3/6-311++G(3df,3pd) | 5224.3 | -13.8      | 900.2 | -3.6       | 865.5 | -3.8       | 18.6     |
| B3LYP-D3/cc-pVDZ           | 5456.4 | 218.3      | 892.7 | -11.1      | 848.1 | -21.2      | 10.8     |
| B3LYP-D3/aug-cc-pVDZ       | 5194.2 | -43.9      | 895.5 | -8.3       | 860.4 | -8.9       | 18.5     |
| B3LYP-D3/cc-pVTZ           | 5339.8 | 101.7      | 897.0 | -6.8       | 858.3 | -11.0      | 15.5     |
| B3LYP-D3/aug-cc-pVTZ       | 5236.7 | -1.4       | 898.6 | -5.2       | 863.3 | -6.0       | 18.2     |

|                              |        |        |       |      |       |       |      |
|------------------------------|--------|--------|-------|------|-------|-------|------|
| B3LYP-D3BJ/6-31G(d,p)        | 5236.6 | -1.5   | 900.4 | -3.4 | 863.7 | -5.6  | 17.3 |
| B3LYP-D3BJ/6-31+G(d,p)       | 4916.1 | -322.0 | 904.9 | 1.1  | 877.5 | 8.2   | 25.4 |
| B3LYP-D3BJ/6-31++G(d,p)      | 4930.8 | -307.3 | 904.1 | 0.3  | 876.4 | 7.1   | 25.0 |
| B3LYP-D3BJ/6-311G(d,p)       | 5337.1 | 99.0   | 896.7 | -7.1 | 857.6 | -11.7 | 15.1 |
| B3LYP-D3BJ/6-311+G(d,p)      | 4999.4 | -238.7 | 904.0 | 0.2  | 875.2 | 5.9   | 23.8 |
| B3LYP-D3BJ/6-311++G(d,p)     | 5010.8 | -227.3 | 903.6 | -0.2 | 874.5 | 5.2   | 23.5 |
| B3LYP-D3BJ/6-311G(2d,2p)     | 5380.0 | 141.9  | 898.1 | -5.7 | 859.0 | -10.3 | 14.7 |
| B3LYP-D3BJ/6-311+G(2d,2p)    | 5092.8 | -145.3 | 903.5 | -0.3 | 873.1 | 3.8   | 22.1 |
| B3LYP-D3BJ/6-311++G(2d,2p)   | 5093.5 | -144.6 | 903.4 | -0.4 | 873.1 | 3.8   | 22.1 |
| B3LYP-D3BJ/6-311G(df,pd)     | 5336.5 | 98.4   | 899.4 | -4.4 | 860.7 | -8.6  | 15.5 |
| B3LYP-D3BJ/6-311+G(df,pd)    | 5001.5 | -236.6 | 906.8 | 3.0  | 878.2 | 8.9   | 24.1 |
| B3LYP-D3BJ/6-311++G(df,pd)   | 5001.3 | -236.8 | 906.9 | 3.1  | 878.3 | 9.0   | 24.1 |
| B3LYP-D3BJ/6-311G(2df,2pd)   | 5406.4 | 168.3  | 898.2 | -5.6 | 858.1 | -11.2 | 14.0 |
| B3LYP-D3BJ/6-311+G(2df,2pd)  | 5114.4 | -123.7 | 903.6 | -0.2 | 872.5 | 3.2   | 21.6 |
| B3LYP-D3BJ/6-311++G(2df,2pd) | 5113.3 | -124.8 | 903.7 | -0.1 | 872.5 | 3.2   | 21.6 |
| B3LYP-D3BJ/6-311G(3df,3pd)   | 5368.9 | 130.8  | 899.1 | -4.7 | 860.1 | -9.2  | 15.2 |
| B3LYP-D3BJ/6-311+G(3df,3pd)  | 5073.1 | -165.0 | 905.8 | 2.0  | 875.9 | 6.6   | 22.7 |
| B3LYP-D3BJ/6-311++G(3df,3pd) | 5071.6 | -166.5 | 905.8 | 2.0  | 876.0 | 6.7   | 22.7 |
| B3LYP-D3BJ/cc-pVDZ           | 5366.4 | 128.3  | 895.2 | -8.6 | 854.4 | -14.9 | 13.6 |
| B3LYP-D3BJ/aug-cc-pVDZ       | 5054.5 | -183.6 | 900.7 | -3.1 | 870.2 | 0.9   | 22.4 |
| B3LYP-D3BJ/cc-pVTZ           | 5219.1 | -19.0  | 901.0 | -2.8 | 866.6 | -2.7  | 18.8 |
| B3LYP-D3BJ/aug-cc-pVTZ       | 5087.4 | -150.7 | 904.0 | 0.2  | 873.5 | 4.2   | 22.2 |
|                              |        |        |       |      |       |       |      |
| CAM-B3LYP-D3BJ/6-311G(d,p)   | 5475.1 | 237.0  | 902.5 | -1.3 | 860.2 | -9.1  | 12.5 |
| CAM-B3LYP-D3BJ/6-311+G(d,p)  | 5208.2 | -29.9  | 906.2 | 2.4  | 872.8 | 3.5   | 19.6 |
| CAM-B3LYP-D3BJ/6-311++G(d,p) | 5210.5 | -27.6  | 906.1 | 2.3  | 872.6 | 3.3   | 19.5 |
| CAM-B3LYP-D3BJ/aug-cc-pVDZ   | 5233.2 | -4.9   | 903.8 | 0.0  | 869.4 | 0.1   | 18.9 |
| CAM-B3LYP-D3BJ/aug-cc-pVTZ   | 5265.4 | 27.3   | 907.4 | 3.6  | 873.1 | 3.8   | 18.8 |
| CAM-B3LYP-D3BJ/cc-pVDZ       | 5500.8 | 262.7  | 901.3 | -2.5 | 857.3 | -12.0 | 11.2 |
| CAM-B3LYP-D3BJ/cc-pVTZ       | 5375.1 | 137.0  | 905.7 | 1.9  | 867.8 | -1.5  | 16.0 |
|                              |        |        |       |      |       |       |      |
| CCSD/cc-pVDZ                 | 5397.0 | 158.9  | 894.4 | -9.4 | 852.0 | -17.3 | 12.6 |
|                              |        |        |       |      |       |       |      |
| M06-2X/6-31G(d,p)            | 5476.6 | 238.5  | 907.5 | 3.7  | 864.0 | -5.3  | 12.1 |
| M06-2X/6-31+G(d,p)           | 5343.3 | 105.2  | 906.4 | 2.6  | 867.6 | -1.7  | 15.7 |
| M06-2X/6-31++G(d,p)          | 5356.8 | 118.7  | 905.9 | 2.1  | 866.7 | -2.6  | 15.3 |
| M06-2X/6-311G(d,p)           | 5523.8 | 285.7  | 905.6 | 1.8  | 861.4 | -7.9  | 11.2 |
| M06-2X/6-311+G(d,p)          | 5361.9 | 123.8  | 907.5 | 3.7  | 869.0 | -0.3  | 15.6 |
| M06-2X/6-311++G(d,p)         | 5359.5 | 121.4  | 907.6 | 3.8  | 869.1 | -0.2  | 15.6 |
| M06-2X/6-311G(2d,2p)         | 5570.8 | 332.7  | 906.6 | 2.8  | 862.2 | -7.1  | 10.7 |
| M06-2X/6-311+G(2d,2p)        | 5422.0 | 183.9  | 908.1 | 4.3  | 868.7 | -0.6  | 14.7 |
| M06-2X/6-311++G(2d,2p)       | 5418.6 | 180.5  | 908.1 | 4.3  | 868.8 | -0.5  | 14.8 |
| M06-2X/6-311G(df,pd)         | 5525.6 | 287.5  | 907.5 | 3.7  | 863.6 | -5.7  | 11.4 |
| M06-2X/6-311+G(df,pd)        | 5368.7 | 130.6  | 909.3 | 5.5  | 870.9 | 1.6   | 15.7 |
| M06-2X/6-311++G(df,pd)       | 5361.9 | 123.8  | 909.6 | 5.8  | 871.4 | 2.1   | 15.9 |
| M06-2X/6-311G(2df,2pd)       | 5579.6 | 341.5  | 906.6 | 2.8  | 861.8 | -7.5  | 10.4 |
| M06-2X/6-311+G(2df,2pd)      | 5436.2 | 198.1  | 907.9 | 4.1  | 867.9 | -1.4  | 14.3 |
| M06-2X/6-311++G(2df,2pd)     | 5433.4 | 195.3  | 907.9 | 4.1  | 868.1 | -1.2  | 14.4 |
| M06-2X/6-311G(3df,3pd)       | 5552.1 | 314.0  | 907.3 | 3.5  | 863.4 | -5.9  | 11.3 |
| M06-2X/6-311+G(3df,3pd)      | 5427.4 | 189.3  | 908.8 | 5.0  | 869.3 | 0.0   | 14.6 |
| M06-2X/6-311++G(3df,3pd)     | 5426.7 | 188.6  | 908.8 | 5.0  | 869.3 | 0.0   | 14.6 |



|                        |        |        |       |       |       |       |      |
|------------------------|--------|--------|-------|-------|-------|-------|------|
| M06-2X/cc-pVDZ         | 5550.5 | 312.4  | 904.9 | 1.1   | 859.4 | -9.9  | 10.1 |
| M06-2X/aug-cc-pVDZ     | 5379.1 | 141.0  | 906.1 | 2.3   | 866.9 | -2.4  | 15.2 |
| M06-2X/cc-pVTZ         | 5476.5 | 238.4  | 907.3 | 3.5   | 865.9 | -3.4  | 13.2 |
| M06-2X/aug-cc-pVTZ     | 5413.0 | 174.9  | 908.0 | 4.2   | 868.9 | -0.4  | 14.9 |
| MN15/6-31G(d,p)        | 5424.1 | 186.0  | 907.3 | 3.5   | 865.8 | -3.5  | 13.4 |
| MN15/6-31+G(d,p)       | 5294.1 | 56.0   | 905.0 | 1.2   | 868.0 | -1.3  | 16.8 |
| MN15/6-31++G(d,p)      | 5307.6 | 69.5   | 904.5 | 0.7   | 867.1 | -2.2  | 16.4 |
| MN15/6-311G(d,p)       | 5504.1 | 266.0  | 906.7 | 2.9   | 863.6 | -5.7  | 11.7 |
| MN15/6-311+G(d,p)      | 5342.9 | 104.8  | 908.5 | 4.7   | 871.0 | 1.7   | 16.0 |
| MN15/6-311++G(d,p)     | 5348.4 | 110.3  | 908.4 | 4.6   | 870.7 | 1.4   | 15.9 |
| MN15/6-311G(2d,2p)     | 5562.1 | 324.0  | 908.8 | 5.0   | 865.2 | -4.1  | 10.9 |
| MN15/6-311+G(2d,2p)    | 5418.2 | 180.1  | 910.0 | 6.2   | 871.2 | 1.9   | 14.8 |
| MN15/6-311++G(2d,2p)   | 5418.1 | 180.0  | 910.0 | 6.2   | 871.1 | 1.8   | 14.8 |
| MN15/6-311G(df,pd)     | 5509.0 | 270.9  | 909.6 | 5.8   | 866.6 | -2.7  | 11.9 |
| MN15/6-311+G(df,pd)    | 5349.3 | 111.2  | 911.3 | 7.5   | 874.0 | 4.7   | 16.3 |
| MN15/6-311++G(df,pd)   | 5348.5 | 110.4  | 911.4 | 7.6   | 874.2 | 4.9   | 16.3 |
| MN15/6-311G(2df,2pd)   | 5580.2 | 342.1  | 909.1 | 5.3   | 864.8 | -4.5  | 10.5 |
| MN15/6-311+G(2df,2pd)  | 5436.4 | 198.3  | 910.3 | 6.5   | 870.9 | 1.6   | 14.4 |
| MN15/6-311++G(2df,2pd) | 5436.7 | 198.6  | 910.3 | 6.5   | 870.8 | 1.5   | 14.4 |
| MN15/6-311G(3df,3pd)   | 5535.6 | 297.5  | 909.8 | 6.0   | 866.9 | -2.4  | 11.7 |
| MN15/6-311+G(3df,3pd)  | 5430.6 | 192.5  | 910.5 | 6.7   | 871.4 | 2.1   | 14.5 |
| MN15/6-311++G(3df,3pd) | 5433.1 | 195.0  | 910.5 | 6.7   | 871.2 | 1.9   | 14.5 |
| MN15/cc-pVDZ           | 5521.3 | 283.2  | 904.2 | 0.4   | 860.2 | -9.1  | 10.8 |
| MN15/aug-cc-pVDZ       | 5370.1 | 132.0  | 906.2 | 2.4   | 867.6 | -1.7  | 15.4 |
| MN15/cc-pVTZ           | 5467.9 | 229.8  | 910.0 | 6.2   | 869.2 | -0.1  | 13.4 |
| MN15/aug-cc-pVTZ       | 5421.6 | 183.5  | 911.1 | 7.3   | 872.1 | 2.8   | 14.7 |
| PBE0/6-31G(d,p)        | 5166.2 | -71.9  | 891.7 | -12.1 | 856.0 | -13.3 | 17.9 |
| PBE0/6-31+G(d,p)       | 4840.1 | -398.0 | 895.9 | -7.9  | 868.3 | -1.0  | 26.3 |
| PBE0/6-31++G(d,p)      | 4857.1 | -381.0 | 895.1 | -8.7  | 867.2 | -2.1  | 25.9 |
| PBE0/6-311G(d,p)       | 5254.7 | 16.6   | 888.7 | -15.1 | 851.0 | -18.3 | 16.0 |
| PBE0/6-311+G(d,p)      | 4906.4 | -331.7 | 896.1 | -7.7  | 867.9 | -1.4  | 25.1 |
| PBE0/6-311++G(d,p)     | 4918.4 | -319.7 | 895.7 | -8.1  | 867.2 | -2.1  | 24.8 |
| PBE0/6-311G(2d,2p)     | 5325.3 | 87.2   | 888.9 | -14.9 | 850.3 | -19.0 | 14.8 |
| PBE0/6-311+G(2d,2p)    | 5013.6 | -224.5 | 894.4 | -9.4  | 864.7 | -4.6  | 23.0 |
| PBE0/6-311++G(2d,2p)   | 5016.4 | -221.7 | 894.3 | -9.5  | 864.5 | -4.8  | 22.9 |
| PBE0/6-311G(df,pd)     | 5263.1 | 25.0   | 891.3 | -12.5 | 853.7 | -15.6 | 16.2 |
| PBE0/6-311+G(df,pd)    | 4912.0 | -326.1 | 898.7 | -5.1  | 870.6 | 1.3   | 25.4 |
| PBE0/6-311++G(df,pd)   | 4923.5 | -314.6 | 898.5 | -5.3  | 870.2 | 0.9   | 25.1 |
| PBE0/6-311G(2df,2pd)   | 5350.7 | 112.6  | 889.4 | -14.4 | 849.8 | -19.5 | 14.1 |
| PBE0/6-311+G(2df,2pd)  | 5039.8 | -198.3 | 894.6 | -9.2  | 864.1 | -5.2  | 22.5 |
| PBE0/6-311++G(2df,2pd) | 5040.4 | -197.7 | 894.6 | -9.2  | 864.0 | -5.3  | 22.4 |
| PBE0/6-311G(3df,3pd)   | 5318.0 | 79.9   | 890.2 | -13.6 | 851.5 | -17.8 | 15.2 |
| PBE0/6-311+G(3df,3pd)  | 4995.1 | -243.0 | 897.0 | -6.8  | 867.7 | -1.6  | 23.6 |
| PBE0/6-311++G(3df,3pd) | 4992.9 | -245.2 | 897.1 | -6.7  | 867.8 | -1.5  | 23.6 |
| PBE0/cc-pVDZ           | 5278.3 | 40.2   | 887.3 | -16.5 | 848.0 | -21.3 | 14.7 |
| PBE0/aug-cc-pVDZ       | 4971.3 | -266.8 | 891.9 | -11.9 | 862.1 | -7.2  | 23.4 |
| PBE0/cc-pVTZ           | 5149.3 | -88.8  | 891.7 | -12.1 | 858.1 | -11.2 | 19.4 |
| PBE0/aug-cc-pVTZ       | 5001.3 | -236.8 | 895.1 | -8.7  | 865.3 | -4.0  | 23.3 |
| PBE0-D3/6-31G(d,p)     | 5134.8 | -103.3 | 896.0 | -7.8  | 860.7 | -8.6  | 18.5 |

|                                   |        |        |       |       |       |       |      |
|-----------------------------------|--------|--------|-------|-------|-------|-------|------|
| PBE0-D3/6-31+G(d,p)               | 4767.4 | -470.7 | 903.0 | -0.8  | 876.7 | 7.4   | 27.9 |
| PBE0-D3/6-31++G(d,p)              | 4785.9 | -452.2 | 901.8 | -2.0  | 875.3 | 6.0   | 27.4 |
| PBE0-D3/6-311G(d,p)               | 5233.5 | -4.6   | 892.7 | -11.1 | 855.0 | -14.3 | 16.3 |
| PBE0-D3/6-311+G(d,p)              | 4846.9 | -391.2 | 902.3 | -1.5  | 875.3 | 6.0   | 26.3 |
| PBE0-D3/6-311++G(d,p)             | 4862.7 | -375.4 | 901.7 | -2.1  | 874.4 | 5.1   | 25.9 |
| PBE0-D3/6-311G(2d,2p)             | 5298.4 | 60.3   | 892.9 | -10.9 | 854.4 | -14.9 | 15.2 |
| PBE0-D3/6-311+G(2d,2p)            | 4957.0 | -281.1 | 900.1 | -3.7  | 871.6 | 2.3   | 24.2 |
| PBE0-D3/6-311++G(2d,2p)           | 4960.3 | -277.8 | 900.0 | -3.8  | 871.4 | 2.1   | 24.0 |
| PBE0-D3/6-311G(df,pd)             | 5239.2 | 1.1    | 895.3 | -8.5  | 857.8 | -11.5 | 16.5 |
| PBE0-D3/6-311+G(df,pd)            | 4857.9 | -380.2 | 904.8 | 1.0   | 877.8 | 8.5   | 26.5 |
| PBE0-D3/6-311++G(df,pd)           | 4862.4 | -375.7 | 904.7 | 0.9   | 877.7 | 8.4   | 26.4 |
| PBE0-D3/6-311G(2df,2pd)           | 5321.4 | 83.3   | 893.4 | -10.4 | 854.0 | -15.3 | 14.6 |
| PBE0-D3/6-311+G(2df,2pd)          | 4983.2 | -254.9 | 900.3 | -3.5  | 871.0 | 1.7   | 23.5 |
| PBE0-D3/6-311++G(2df,2pd)         | 4983.7 | -254.4 | 900.2 | -3.6  | 870.9 | 1.6   | 23.5 |
| PBE0-D3/6-311G(3df,3pd)           | 5293.2 | 55.1   | 894.2 | -9.6  | 855.5 | -13.8 | 15.6 |
| PBE0-D3/6-311+G(3df,3pd)          | 4936.8 | -301.3 | 902.9 | -0.9  | 874.9 | 5.6   | 24.8 |
| PBE0-D3/6-311++G(3df,3pd)         | 4935.6 | -302.5 | 903.0 | -0.8  | 874.9 | 5.6   | 24.8 |
| PBE0-D3/cc-pVDZ                   | 5259.9 | 21.8   | 891.0 | -12.8 | 851.6 | -17.7 | 14.8 |
| PBE0-D3/aug-cc-pVDZ               | 4912.0 | -326.1 | 897.9 | -5.9  | 869.4 | 0.1   | 24.6 |
| PBE0-D3/cc-pVTZ                   | 5115.6 | -122.5 | 896.3 | -7.5  | 863.2 | -6.1  | 20.1 |
| PBE0-D3/aug-cc-pVTZ               | 4943.1 | -295.0 | 901.0 | -2.8  | 872.5 | 3.2   | 24.5 |
|                                   |        |        |       |       |       |       |      |
| $\omega$ B97X-D/6-31G(d,p)        | 5307.3 | 69.2   | 903.6 | -0.2  | 865.5 | -3.8  | 16.3 |
| $\omega$ B97X-D/6-31+G(d,p)       | 5074.7 | -163.4 | 905.8 | 2.0   | 874.9 | 5.6   | 22.2 |
| $\omega$ B97X-D/6-31++G(d,p)      | 5085.2 | -152.9 | 905.3 | 1.5   | 874.1 | 4.8   | 22.0 |
| $\omega$ B97X-D/6-311G(d,p)       | 5128.0 | -110.1 | 906.4 | 2.6   | 874.7 | 5.4   | 21.3 |
| $\omega$ B97X-D/6-311+G(d,p)      | 5133.3 | -104.8 | 906.2 | 2.4   | 874.4 | 5.1   | 21.2 |
| $\omega$ B97X-D/6-311++G(d,p)     | 5367.6 | 129.5  | 902.0 | -1.8  | 862.8 | -6.5  | 15.2 |
| $\omega$ B97X-D/6-311G(2d,2p)     | 5429.9 | 191.8  | 902.6 | -1.2  | 862.7 | -6.6  | 14.1 |
| $\omega$ B97X-D/6-311+G(2d,2p)    | 5208.1 | -30.0  | 905.9 | 2.1   | 872.9 | 3.6   | 20.0 |
| $\omega$ B97X-D/6-311++G(2d,2p)   | 5206.5 | -31.6  | 905.9 | 2.1   | 873.0 | 3.7   | 20.0 |
| $\omega$ B97X-D/6-311G(df,pd)     | 5363.2 | 125.1  | 904.6 | 0.8   | 865.9 | -3.4  | 15.6 |
| $\omega$ B97X-D/6-311+G(df,pd)    | 5128.6 | -109.5 | 908.9 | 5.1   | 877.4 | 8.1   | 21.7 |
| $\omega$ B97X-D/6-311++G(df,pd)   | 5124.1 | -114.0 | 909.1 | 5.3   | 877.8 | 8.5   | 21.8 |
| $\omega$ B97X-D/6-311G(2df,2pd)   | 5579.6 | 341.5  | 906.6 | 2.8   | 861.8 | -7.5  | 10.4 |
| $\omega$ B97X-D/6-311+G(2df,2pd)  | 5436.2 | 198.1  | 907.9 | 4.1   | 867.9 | -1.4  | 14.3 |
| $\omega$ B97X-D/6-311++G(2df,2pd) | 5433.4 | 195.3  | 907.9 | 4.1   | 868.1 | -1.2  | 14.4 |
| $\omega$ B97X-D/6-311G(3df,3pd)   | 5397.3 | 159.2  | 904.2 | 0.4   | 864.9 | -4.4  | 15.1 |
| $\omega$ B97X-D/6-311+G(3df,3pd)  | 5201.7 | -36.4  | 907.5 | 3.7   | 874.5 | 5.2   | 20.2 |
| $\omega$ B97X-D/6-311++G(3df,3pd) | 5199.8 | -38.3  | 907.5 | 3.7   | 874.6 | 5.3   | 20.2 |
| $\omega$ B97X-D/aug-cc-pVDZ       | 5150.7 | -87.4  | 903.3 | -0.5  | 870.7 | 1.4   | 20.6 |
| $\omega$ B97X-D/aug-cc-pVTZ       | 5200.0 | -38.1  | 906.4 | 2.6   | 873.3 | 4.0   | 20.1 |
| $\omega$ B97X-D/cc-pVDZ           | 5400.9 | 162.8  | 899.5 | -4.3  | 858.6 | -10.7 | 13.6 |
| $\omega$ B97X-D/cc-pVTZ           | 5281.6 | 43.5   | 904.6 | 0.8   | 869.1 | -0.2  | 18.0 |
|                                   |        |        |       |       |       |       |      |
| MP2/6-31G(d,p)                    | 5179.1 | -59.0  | 912.1 | 8.3   | 876.2 | 6.9   | 19.4 |
| MP2/6-31+G(d,p)                   | 4655.1 | -583.0 | 931.6 | 27.8  | 907.2 | 37.9  | 32.5 |
| MP2/6-31++G(d,p)                  | 4561.3 | -676.8 | 938.4 | 34.6  | 912.6 | 43.3  | 34.8 |
| MP2/6-311G(d,p)                   | 5002.1 | -236.0 | 919.0 | 15.2  | 890.1 | 20.8  | 24.3 |

|                       |               |        |              |      |              |      |      |
|-----------------------|---------------|--------|--------------|------|--------------|------|------|
| MP2/6-311+G(d,p)      | 4550.3        | -687.8 | 943.2        | 39.4 | 917.9        | 48.6 | 35.2 |
| MP2/6-311++G(d,p)     | 4571.6        | -666.5 | 941.4        | 37.6 | 916.5        | 47.2 | 34.7 |
| MP2/6-311G(2d,2p)     | 5336.1        | 98.0   | 911.4        | 7.6  | 872.5        | 3.2  | 15.9 |
| MP2/6-311+G(2d,2p)    | 5011.1        | -227.0 | 919.1        | 15.3 | 890.6        | 21.3 | 24.4 |
| MP2/6-311++G(2d,2p)   | 5002.8        | -235.3 | 919.3        | 15.5 | 891.0        | 21.7 | 24.6 |
| MP2/6-311G(df,pd)     | 5037.7        | -200.4 | 925.9        | 22.1 | 897.3        | 28.0 | 24.4 |
| MP2/6-311+G(df,pd)    | 4539.2        | -698.9 | 954.4        | 50.6 | 928.0        | 58.7 | 36.6 |
| MP2/6-311++G(df,pd)   | 4539.8        | -698.3 | 954.3        | 50.5 | 927.9        | 58.6 | 36.5 |
| MP2/6-311G(2df,2pd)   | 5377.1        | 139.0  | 915.9        | 12.1 | 875.8        | 6.5  | 15.2 |
| MP2/6-311+G(2df,2pd)  | 5041.1        | -197.0 | 923.5        | 19.7 | 894.5        | 25.2 | 24.0 |
| MP2/6-311++G(2df,2pd) | 5029.3        | -208.8 | 923.9        | 20.1 | 895.2        | 25.9 | 24.4 |
| MP2/6-311G(3df,3pd)   | 5305.6        | 67.5   | 916.9        | 13.1 | 878.9        | 9.6  | 17.0 |
| MP2/6-311+G(3df,3pd)  | 4978.4        | -259.7 | 926.3        | 22.5 | 899.0        | 29.7 | 25.4 |
| MP2/6-311++G(3df,3pd) | 4978.8        | -259.3 | 926.3        | 22.5 | 898.9        | 29.6 | 25.4 |
| MP2/cc-pVDZ           | 5259.6        | 21.5   | 904.4        | 0.6  | 865.6        | -3.7 | 16.2 |
| MP2/aug-cc-pVDZ       | 4695.1        | -543.0 | 924.4        | 20.6 | 901.4        | 32.1 | 30.9 |
| MP2/cc-pVTZ           | 5132.5        | -105.6 | 919.1        | 15.3 | 886.9        | 17.6 | 21.4 |
| MP2/aug-cc-pVTZ       | 4978.8        | -259.3 | 924.2        | 20.4 | 896.5        | 27.2 | 25.1 |
| <b>Expt.</b>          | <b>5238.1</b> |        | <b>903.8</b> |      | <b>869.3</b> |      |      |

**Table S-4.** The rotational constants  $A$ ,  $B$ ,  $C$  (in MHz) of conformer aaa of ethyl butyrate calculated at different levels of theory and their deviations to the experimental values (calc.–exp.)  $\Delta A$ ,  $\Delta B$ , and  $\Delta C$ , respectively (in MHz). The  $\Theta$  angle (in degree) is also given.

| Level of theory            | $A$    | $\Delta A$ | $B$   | $\Delta B$ | $C$   | $\Delta C$ | $\Theta$ |
|----------------------------|--------|------------|-------|------------|-------|------------|----------|
| B3LYP/6-31G(d,p)           | 6308.5 | -19.8      | 799.1 | -7.5       | 725.2 | -7.2       | 0.0      |
| B3LYP/6-31+G(d,p)          | 6240.4 | -87.9      | 797.0 | -9.6       | 722.6 | -9.8       | 0.0      |
| B3LYP/6-31++G(d,p)         | 6241.5 | -86.8      | 797.0 | -9.6       | 722.6 | -9.8       | 0.0      |
| B3LYP/6-311G(d,p)          | 6291.4 | -36.9      | 800.1 | -6.5       | 725.7 | -6.7       | 0.0      |
| B3LYP/6-311+G(d,p)         | 6258.5 | -69.8      | 798.9 | -7.7       | 724.3 | -8.1       | 0.0      |
| B3LYP/6-311++G(d,p)        | 6258.8 | -69.5      | 798.9 | -7.7       | 724.3 | -8.1       | 0.0      |
| B3LYP/6-311G(2d,2p)        | 6364.1 | 35.8       | 801.4 | -5.2       | 727.7 | -4.7       | 0.0      |
| B3LYP/6-311+G(2d,2p)       | 6315.8 | -12.5      | 800.4 | -6.2       | 726.2 | -6.2       | 0.0      |
| B3LYP/6-311++G(2d,2p)      | 6315.9 | -12.4      | 800.4 | -6.2       | 726.2 | -6.2       | 0.0      |
| B3LYP/6-311G(df,pd)        | 6304.3 | -24.0      | 802.3 | -4.3       | 727.6 | -4.8       | 0.0      |
| B3LYP/6-311+G(df,pd)       | 6275.1 | -53.2      | 801.0 | -5.6       | 726.2 | -6.2       | 0.0      |
| B3LYP/6-311++G(df,pd)      | 6275.4 | -52.9      | 801.0 | -5.6       | 726.2 | -6.2       | 0.0      |
| B3LYP/6-311G(2df,2pd)      | 6339.8 | 11.5       | 802.9 | -3.7       | 728.6 | -3.8       | 0.0      |
| B3LYP/6-311+G(2df,2pd)     | 6299.5 | -28.8      | 801.8 | -4.8       | 727.1 | -5.3       | 0.0      |
| B3LYP/6-311++G(2df,2pd)    | 6299.8 | -28.5      | 801.7 | -4.9       | 727.1 | -5.3       | 0.0      |
| B3LYP/6-311G(3df,3pd)      | 6331.2 | 2.9        | 803.2 | -3.4       | 728.7 | -3.7       | 0.0      |
| B3LYP/6-311+G(3df,3pd)     | 6305.6 | -22.7      | 801.9 | -4.7       | 727.3 | -5.1       | 0.0      |
| B3LYP/6-311++G(3df,3pd)    | 6305.5 | -22.8      | 801.9 | -4.7       | 727.3 | -5.1       | 0.0      |
| B3LYP/cc-pVDZ              | 6295.3 | -33.0      | 799.3 | -7.3       | 725.3 | -7.1       | 0.0      |
| B3LYP/aug-cc-pVDZ          | 6254.7 | -73.6      | 797.6 | -9.0       | 723.3 | -9.1       | 0.0      |
| B3LYP/cc-pVTZ              | 6304.2 | -24.1      | 802.1 | -4.5       | 727.4 | -5.0       | 0.0      |
| B3LYP/aug-cc-pVTZ          | 6295.4 | -32.9      | 801.4 | -5.2       | 726.8 | -5.6       | 0.0      |
|                            |        |            |       |            |       |            |          |
| B3LYP-D3/6-31G(d,p)        | 6310.7 | -17.6      | 801.4 | -5.2       | 727.0 | -5.4       | 0.0      |
| B3LYP-D3/6-31+G(d,p)       | 6246.0 | -82.3      | 799.2 | -7.4       | 724.4 | -8.0       | 0.0      |
| B3LYP-D3/6-31++G(d,p)      | 6247.1 | -81.2      | 799.2 | -7.4       | 724.4 | -8.0       | 0.0      |
| B3LYP-D3/6-311G(d,p)       | 6293.7 | -34.6      | 802.4 | -4.2       | 727.6 | -4.8       | 0.0      |
| B3LYP-D3/6-311+G(d,p)      | 6260.8 | -67.5      | 801.2 | -5.4       | 726.2 | -6.2       | 0.0      |
| B3LYP-D3/6-311++G(d,p)     | 6261.1 | -67.2      | 801.2 | -5.4       | 726.2 | -6.2       | 0.0      |
| B3LYP-D3/6-311G(2d,2p)     | 6365.7 | 37.4       | 803.6 | -3.0       | 729.5 | -2.9       | 0.0      |
| B3LYP-D3/6-311+G(2d,2p)    | 6318.7 | -9.6       | 802.7 | -3.9       | 728.1 | -4.3       | 0.0      |
| B3LYP-D3/6-311++G(2d,2p)   | 6318.8 | -9.5       | 802.7 | -3.9       | 728.1 | -4.3       | 0.0      |
| B3LYP-D3/6-311G(df,pd)     | 6307.5 | -20.8      | 804.5 | -2.1       | 729.5 | -2.9       | 0.0      |
| B3LYP-D3/6-311+G(df,pd)    | 6278.3 | -50.0      | 803.3 | -3.3       | 728.2 | -4.2       | 0.0      |
| B3LYP-D3/6-311++G(df,pd)   | 6278.6 | -49.7      | 803.3 | -3.3       | 728.2 | -4.2       | 0.0      |
| B3LYP-D3/6-311G(2df,2pd)   | 6342.3 | 14.0       | 805.1 | -1.5       | 730.4 | -2.0       | 0.0      |
| B3LYP-D3/6-311+G(2df,2pd)  | 6303.2 | -25.1      | 804.0 | -2.6       | 729.0 | -3.4       | 0.0      |
| B3LYP-D3/6-311++G(2df,2pd) | 6303.6 | -24.7      | 804.0 | -2.6       | 729.0 | -3.4       | 0.0      |
| B3LYP-D3/6-311G(3df,3pd)   | 6334.1 | 5.8        | 805.3 | -1.3       | 730.5 | -1.9       | 0.0      |
| B3LYP-D3/6-311+G(3df,3pd)  | 6310.0 | -18.3      | 804.1 | -2.5       | 729.2 | -3.2       | 0.0      |
| B3LYP-D3/6-311++G(3df,3pd) | 6309.9 | -18.4      | 804.1 | -2.5       | 729.2 | -3.2       | 0.0      |
| B3LYP-D3/cc-pVDZ           | 6297.1 | -31.2      | 801.6 | -5.0       | 727.2 | -5.2       | 0.0      |
| B3LYP-D3/aug-cc-pVDZ       | 6259.6 | -68.7      | 799.8 | -6.8       | 725.2 | -7.2       | 0.0      |
| B3LYP-D3/cc-pVTZ           | 6307.8 | -20.5      | 804.3 | -2.3       | 729.3 | -3.1       | 0.0      |
| B3LYP-D3/aug-cc-pVTZ       | 6297.8 | -30.5      | 803.9 | -2.7       | 728.8 | -3.6       | 0.0      |

|                                         |        |       |       |      |       |      |     |
|-----------------------------------------|--------|-------|-------|------|-------|------|-----|
| B3LYP-D3BJ/6-31G(d,p)                   | 6328.3 | 0.0   | 802.0 | -4.6 | 727.8 | -4.6 | 0.0 |
| B3LYP-D3BJ/6-31+G(d,p)                  | 6261.6 | -66.7 | 799.9 | -6.7 | 725.2 | -7.2 | 0.0 |
| B3LYP-D3BJ/6-31++G(d,p)                 | 6262.7 | -65.6 | 799.9 | -6.7 | 725.2 | -7.2 | 0.0 |
| B3LYP-D3BJ/6-311G(d,p)                  | 6310.1 | -18.2 | 803.2 | -3.4 | 728.5 | -3.9 | 0.0 |
| B3LYP-D3BJ/6-311+G(d,p)                 | 6279.7 | -48.6 | 801.9 | -4.7 | 727.0 | -5.4 | 0.0 |
| B3LYP-D3BJ/6-311++G(d,p)                | 6276.4 | -51.9 | 802.0 | -4.6 | 727.1 | -5.3 | 0.0 |
| B3LYP-D3BJ/6-311G(2d,2p)                | 6384.0 | 55.7  | 804.4 | -2.2 | 730.3 | -2.1 | 0.0 |
| B3LYP-D3BJ/6-311+G(2d,2p)               | 6335.2 | 6.9   | 803.4 | -3.2 | 728.9 | -3.5 | 0.0 |
| B3LYP-D3BJ/6-311++G(2d,2p)              | 6335.3 | 7.0   | 803.4 | -3.2 | 728.9 | -3.5 | 0.0 |
| B3LYP-D3BJ/6-311G(df,pd)                | 6324.0 | -4.3  | 805.2 | -1.4 | 730.3 | -2.1 | 0.0 |
| B3LYP-D3BJ/6-311+G(df,pd)               | 6296.6 | -31.7 | 803.9 | -2.7 | 728.9 | -3.5 | 0.0 |
| B3LYP-D3BJ/6-311++G(df,pd)              | 6296.9 | -31.4 | 803.9 | -2.7 | 728.9 | -3.5 | 0.0 |
| B3LYP-D3BJ/6-311G(2df,2pd)              | 6360.0 | 31.7  | 805.8 | -0.8 | 731.2 | -1.2 | 0.0 |
| B3LYP-D3BJ/6-311+G(2df,2pd)             | 6320.3 | -8.0  | 804.6 | -2.0 | 729.7 | -2.7 | 0.0 |
| B3LYP-D3BJ/6-311++G(2df,2pd)            | 6320.6 | -7.7  | 804.6 | -2.0 | 729.7 | -2.7 | 0.0 |
| B3LYP-D3BJ/6-311G(3df,3pd)              | 6351.6 | 23.3  | 806.0 | -0.6 | 731.3 | -1.1 | 0.0 |
| B3LYP-D3BJ/6-311+G(3df,3pd)             | 6326.0 | -2.3  | 804.8 | -1.8 | 730.0 | -2.4 | 0.0 |
| B3LYP-D3BJ/6-311++G(3df,3pd)            | 6325.9 | -2.4  | 804.8 | -1.8 | 730.0 | -2.4 | 0.0 |
| B3LYP-D3BJ/cc-pVDZ                      | 6314.8 | -13.5 | 802.2 | -4.4 | 728.0 | -4.4 | 0.0 |
| B3LYP-D3BJ/aug-cc-pVDZ                  | 6275.5 | -52.8 | 800.5 | -6.1 | 726.0 | -6.4 | 0.0 |
| B3LYP-D3BJ/cc-pVTZ                      | 6324.0 | -4.3  | 805.1 | -1.5 | 730.1 | -2.3 | 0.0 |
| B3LYP-D3BJ/aug-cc-pVTZ                  | 6315.2 | -13.1 | 804.4 | -2.2 | 729.5 | -2.9 | 0.0 |
|                                         |        |       |       |      |       |      |     |
| CAM-B3LYP-D3BJ/6-311G(d,p)              | 6388.3 | 60.0  | 809.6 | 3.0  | 734.8 | 2.4  | 0.0 |
| CAM-B3LYP-D3BJ/6-311+G(d,p)             | 6353.3 | 25.0  | 808.5 | 1.9  | 733.4 | 1.0  | 0.0 |
| CAM-B3LYP-D3BJ/6-311++G(d,p)            | 6353.5 | 25.2  | 808.5 | 1.9  | 733.4 | 1.0  | 0.0 |
| CAM-B3LYP-D3BJ/aug-cc-pVDZ <sup>a</sup> | 6353.9 | 25.6  | 806.9 | 0.3  | 732.3 | -0.1 | 0.0 |
| CAM-B3LYP-D3BJ/aug-cc-pVTZ              | 6391.7 | 63.4  | 811.0 | 4.4  | 735.9 | 3.5  | 0.0 |
| CAM-B3LYP-D3BJ/cc-pVDZ                  | 6399.5 | 71.2  | 808.6 | 2.0  | 734.3 | 1.9  | 0.0 |
| CAM-B3LYP-D3BJ/cc-pVTZ                  | 6401.0 | 72.7  | 811.7 | 5.1  | 736.6 | 4.2  | 0.0 |
| CCSD/cc-pVDZ                            | 6327.8 | -0.5  | 801.2 | -5.4 | 727.5 | -4.9 | 0.0 |
|                                         |        |       |       |      |       |      |     |
| M06-2X/6-31G(d,p)                       | 6445.8 | 117.5 | 808.9 | 2.3  | 735.0 | 2.6  | 0.0 |
| M06-2X/6-31+G(d,p)                      | 6389.4 | 61.1  | 807.4 | 0.8  | 733.1 | 0.7  | 0.0 |
| M06-2X/6-31++G(d,p)                     | 6389.5 | 61.2  | 807.4 | 0.8  | 733.1 | 0.7  | 0.0 |
| M06-2X/6-311G(d,p)                      | 6430.5 | 102.2 | 809.8 | 3.2  | 735.6 | 3.2  | 0.0 |
| M06-2X/6-311+G(d,p)                     | 6401.6 | 73.3  | 809.1 | 2.5  | 734.6 | 2.2  | 0.0 |
| M06-2X/6-311++G(d,p)                    | 6401.9 | 73.6  | 809.1 | 2.5  | 734.6 | 2.2  | 0.0 |
| M06-2X/6-311G(2d,2p)                    | 6507.6 | 179.3 | 810.8 | 4.2  | 737.3 | 4.9  | 0.0 |
| M06-2X/6-311+G(2d,2p)                   | 6465.3 | 137.0 | 810.2 | 3.6  | 736.2 | 3.8  | 0.0 |
| M06-2X/6-311++G(2d,2p)                  | 6465.4 | 137.1 | 810.1 | 3.5  | 736.2 | 3.8  | 0.0 |
| M06-2X/6-311G(df,pd)                    | 6440.4 | 112.1 | 811.4 | 4.8  | 736.9 | 4.5  | 0.0 |
| M06-2X/6-311+G(df,pd)                   | 6415.1 | 86.8  | 810.5 | 3.9  | 735.9 | 3.5  | 0.0 |
| M06-2X/6-311++G(df,pd)                  | 6415.5 | 87.2  | 810.5 | 3.9  | 735.9 | 3.5  | 0.0 |
| M06-2X/6-311G(2df,2pd)                  | 6480.5 | 152.2 | 811.9 | 5.3  | 737.8 | 5.4  | 0.0 |
| M06-2X/6-311+G(2df,2pd)                 | 6445.6 | 117.3 | 811.0 | 4.4  | 736.6 | 4.2  | 0.0 |
| M06-2X/6-311++G(2df,2pd)                | 6445.9 | 117.6 | 811.0 | 4.4  | 736.6 | 4.2  | 0.0 |
| M06-2X/6-311G(3df,3pd)                  | 6475.5 | 147.2 | 812.1 | 5.5  | 737.9 | 5.5  | 0.0 |
| M06-2X/6-311+G(3df,3pd)                 | 6454.6 | 126.3 | 811.1 | 4.5  | 736.8 | 4.4  | 0.0 |
| M06-2X/6-311++G(3df,3pd)                | 6454.6 | 126.3 | 811.1 | 4.5  | 736.8 | 4.4  | 0.0 |
| M06-2X/aug-cc-pVDZ                      | 6419.2 | 90.9  | 807.6 | 1.0  | 733.8 | 1.4  | 0.0 |

|                        |        |        |       |       |       |       |     |
|------------------------|--------|--------|-------|-------|-------|-------|-----|
| M06-2X/aug-cc-pVTZ     | 6440.3 | 112.0  | 810.9 | 4.3   | 736.5 | 4.1   | 0.0 |
| M06-2X/cc-pVDZ         | 6457.4 | 129.1  | 809.2 | 2.6   | 735.6 | 3.2   | 0.0 |
| M06-2X/cc-pVTZ         | 6446.6 | 118.3  | 811.4 | 4.8   | 737.0 | 4.6   | 0.0 |
| MN15/6-31G(d,p)        | 6465.5 | 137.2  | 807.4 | 0.8   | 734.0 | 1.6   | 0.0 |
| MN15/6-31+G(d,p)       | 6394.5 | 66.2   | 805.6 | -1.0  | 731.6 | -0.8  | 0.0 |
| MN15/6-31++G(d,p)      | 6396.0 | 67.7   | 805.6 | -1.0  | 731.6 | -0.8  | 0.0 |
| MN15/6-311G(d,p)       | 6450.3 | 122.0  | 810.2 | 3.6   | 736.1 | 3.7   | 0.0 |
| MN15/6-311+G(d,p)      | 6419.6 | 91.3   | 809.4 | 2.8   | 735.0 | 2.6   | 0.0 |
| MN15/6-311++G(d,p)     | 6419.8 | 91.5   | 809.4 | 2.8   | 735.1 | 2.7   | 0.0 |
| MN15/6-311G(2d,2p)     | 6547.9 | 219.6  | 811.8 | 5.2   | 738.6 | 6.2   | 0.0 |
| MN15/6-311+G(2d,2p)    | 6500.8 | 172.5  | 811.0 | 4.4   | 737.3 | 4.9   | 0.0 |
| MN15/6-311++G(2d,2p)   | 6500.3 | 172.0  | 811.0 | 4.4   | 737.3 | 4.9   | 0.0 |
| MN15/6-311G(df,pd)     | 6468.5 | 140.2  | 812.3 | 5.7   | 738.0 | 5.6   | 0.0 |
| MN15/6-311+G(df,pd)    | 6443.2 | 114.9  | 811.2 | 4.6   | 736.8 | 4.4   | 0.0 |
| MN15/6-311++G(df,pd)   | 6443.2 | 114.9  | 811.2 | 4.6   | 736.8 | 4.4   | 0.0 |
| MN15/6-311G(2df,2pd)   | 6525.9 | 197.6  | 813.0 | 6.4   | 739.3 | 6.9   | 0.0 |
| MN15/6-311+G(2df,2pd)  | 6488.0 | 159.7  | 812.0 | 5.4   | 738.0 | 5.6   | 0.0 |
| MN15/6-311++G(2df,2pd) | 6488.1 | 159.8  | 812.0 | 5.4   | 738.0 | 5.6   | 0.0 |
| MN15/6-311G(3df,3pd)   | 6508.8 | 180.5  | 813.2 | 6.6   | 739.2 | 6.8   | 0.0 |
| MN15/6-311+G(3df,3pd)  | 6485.3 | 157.0  | 812.0 | 5.4   | 738.0 | 5.6   | 0.0 |
| MN15/6-311++G(3df,3pd) | 6485.8 | 157.5  | 812.0 | 5.4   | 738.0 | 5.6   | 0.0 |
| MN15/cc-pVDZ           | 6483.6 | 155.3  | 808.1 | 1.5   | 735.0 | 2.6   | 0.0 |
| MN15/aug-cc-pVDZ       | 6433.8 | 105.5  | 807.7 | 1.1   | 734.0 | 1.6   | 0.0 |
| MN15/cc-pVTZ           | 6481.5 | 153.2  | 812.5 | 5.9   | 738.3 | 5.9   | 0.0 |
| MN15/aug-cc-pVTZ       | 6482.0 | 153.7  | 812.6 | 6.0   | 738.4 | 6.0   | 0.0 |
| PBE0/6-31G(d,p)        | 6276.4 | -51.9  | 795.4 | -11.2 | 721.9 | -10.5 | 0.0 |
| PBE0/6-31+G(d,p)       | 6202.8 | -125.5 | 793.2 | -13.4 | 719.1 | -13.3 | 0.0 |
| PBE0/6-31++G(d,p)      | 6203.9 | -124.4 | 793.2 | -13.4 | 719.1 | -13.3 | 0.0 |
| PBE0/6-311G(d,p)       | 6263.1 | -65.2  | 796.6 | -10.0 | 722.7 | -9.7  | 0.0 |
| PBE0/6-311+G(d,p)      | 6225.7 | -102.6 | 795.3 | -11.3 | 721.1 | -11.3 | 0.0 |
| PBE0/6-311++G(d,p)     | 6226.3 | -102.0 | 795.3 | -11.3 | 721.1 | -11.3 | 0.0 |
| PBE0/6-311G(2d,2p)     | 6333.6 | 5.3    | 797.6 | -9.0  | 724.4 | -8.0  | 0.0 |
| PBE0/6-311+G(2d,2p)    | 6279.4 | -48.9  | 796.6 | -10.0 | 722.8 | -9.6  | 0.0 |
| PBE0/6-311++G(2d,2p)   | 6279.5 | -48.8  | 796.5 | -10.1 | 722.8 | -9.6  | 0.0 |
| PBE0/6-311G(df,pd)     | 6276.9 | -51.4  | 798.7 | -7.9  | 724.6 | -7.8  | 0.0 |
| PBE0/6-311+G(df,pd)    | 6243.8 | -84.5  | 797.2 | -9.4  | 722.9 | -9.5  | 0.0 |
| PBE0/6-311++G(df,pd)   | 6244.4 | -83.9  | 797.2 | -9.4  | 722.9 | -9.5  | 0.0 |
| PBE0/6-311G(2df,2pd)   | 6312.8 | -15.5  | 799.2 | -7.4  | 725.4 | -7.0  | 0.0 |
| PBE0/6-311+G(2df,2pd)  | 6266.8 | -61.5  | 797.9 | -8.7  | 723.7 | -8.7  | 0.0 |
| PBE0/6-311++G(2df,2pd) | 6267.2 | -61.1  | 797.9 | -8.7  | 723.7 | -8.7  | 0.0 |
| PBE0/6-311G(3df,3pd)   | 6302.7 | -25.6  | 799.5 | -7.1  | 725.5 | -6.9  | 0.0 |
| PBE0/6-311+G(3df,3pd)  | 6273.0 | -55.3  | 798.1 | -8.5  | 723.9 | -8.5  | 0.0 |
| PBE0/6-311++G(3df,3pd) | 6272.8 | -55.5  | 798.1 | -8.5  | 723.9 | -8.5  | 0.0 |
| PBE0/cc-pVDZ           | 6261.3 | -67.0  | 795.9 | -10.7 | 722.2 | -10.2 | 0.0 |
| PBE0/aug-cc-pVDZ       | 6218.8 | -109.5 | 793.9 | -12.7 | 720.0 | -12.4 | 0.0 |
| PBE0/cc-pVTZ           | 6271.8 | -56.5  | 798.3 | -8.3  | 724.1 | -8.3  | 0.0 |
| PBE0/aug-cc-pVTZ       | 6259.1 | -69.2  | 797.5 | -9.1  | 723.3 | -9.1  | 0.0 |
| PBE0-D3/6-31G(d,p)     | 6267.7 | -60.6  | 796.5 | -10.1 | 722.7 | -9.7  | 0.0 |

|                                   |        |        |       |       |       |       |     |
|-----------------------------------|--------|--------|-------|-------|-------|-------|-----|
| PBE0-D3/6-31+G(d,p)               | 6195.6 | -132.7 | 794.3 | -12.3 | 719.9 | -12.5 | 0.0 |
| PBE0-D3/6-31++G(d,p)              | 6196.7 | -131.6 | 794.2 | -12.4 | 719.9 | -12.5 | 0.0 |
| PBE0-D3/6-311G(d,p)               | 6254.7 | -73.6  | 797.7 | -8.9  | 723.4 | -9.0  | 0.0 |
| PBE0-D3/6-311+G(d,p)              | 6218.3 | -110.0 | 796.4 | -10.2 | 721.9 | -10.5 | 0.0 |
| PBE0-D3/6-311++G(d,p)             | 6218.9 | -109.4 | 796.4 | -10.2 | 721.9 | -10.5 | 0.0 |
| PBE0-D3/6-311G(2d,2p)             | 6324.5 | -3.8   | 798.7 | -7.9  | 725.1 | -7.3  | 0.0 |
| PBE0-D3/6-311+G(2d,2p)            | 6271.3 | -57.0  | 797.6 | -9.0  | 723.5 | -8.9  | 0.0 |
| PBE0-D3/6-311++G(2d,2p)           | 6271.4 | -56.9  | 797.6 | -9.0  | 723.5 | -8.9  | 0.0 |
| PBE0-D3/6-311G(df,pd)             | 6268.4 | -59.9  | 799.8 | -6.8  | 725.3 | -7.1  | 0.0 |
| PBE0-D3/6-311+G(df,pd)            | 6236.2 | -92.1  | 798.3 | -8.3  | 723.7 | -8.7  | 0.0 |
| PBE0-D3/6-311++G(df,pd)           | 6236.8 | -91.5  | 798.3 | -8.3  | 723.7 | -8.7  | 0.0 |
| PBE0-D3/6-311G(2df,2pd)           | 6303.9 | -24.4  | 800.2 | -6.4  | 726.1 | -6.3  | 0.0 |
| PBE0-D3/6-311+G(2df,2pd)          | 6258.8 | -69.5  | 798.9 | -7.7  | 724.5 | -7.9  | 0.0 |
| PBE0-D3/6-311++G(2df,2pd)         | 6259.2 | -69.1  | 798.9 | -7.7  | 724.4 | -8.0  | 0.0 |
| PBE0-D3/6-311G(3df,3pd)           | 6294.0 | -34.3  | 800.5 | -6.1  | 726.2 | -6.2  | 0.0 |
| PBE0-D3/6-311+G(3df,3pd)          | 6265.0 | -63.3  | 799.1 | -7.5  | 724.7 | -7.7  | 0.0 |
| PBE0-D3/6-311++G(3df,3pd)         | 6264.9 | -63.4  | 799.1 | -7.5  | 724.7 | -7.7  | 0.0 |
| PBE0-D3/cc-pVDZ                   | 6252.4 | -75.9  | 797.0 | -9.6  | 723.0 | -9.4  | 0.0 |
| PBE0-D3/aug-cc-pVDZ               | 6211.3 | -117.0 | 795.0 | -11.6 | 720.8 | -11.6 | 0.0 |
| PBE0-D3/cc-pVTZ                   | 6263.7 | -64.6  | 799.3 | -7.3  | 724.8 | -7.6  | 0.0 |
| PBE0-D3/aug-cc-pVTZ               | 6251.3 | -77.0  | 798.6 | -8.0  | 724.1 | -8.3  | 0.0 |
|                                   |        |        |       |       |       |       |     |
| $\omega$ B97X-D/6-31G(d,p)        | 6357.0 | 28.7   | 807.1 | 0.5   | 732.4 | 0.0   | 0.0 |
| $\omega$ B97X-D/6-31+G(d,p)       | 6302.3 | -26.0  | 805.8 | -0.8  | 730.6 | -1.8  | 0.0 |
| $\omega$ B97X-D/6-31++G(d,p)      | 6302.4 | -25.9  | 805.8 | -0.8  | 730.6 | -1.8  | 0.0 |
| $\omega$ B97X-D/6-311G(d,p)       | 6317.2 | -11.1  | 807.7 | 1.1   | 732.3 | -0.1  | 0.0 |
| $\omega$ B97X-D/6-311+G(d,p)      | 6317.5 | -10.8  | 807.7 | 1.1   | 732.3 | -0.1  | 0.0 |
| $\omega$ B97X-D/6-311++G(d,p)     | 6347.0 | 18.7   | 808.5 | 1.9   | 733.4 | 1.0   | 0.0 |
| $\omega$ B97X-D/6-311G(2d,2p)     | 6415.4 | 87.1   | 809.6 | 3.0   | 735.1 | 2.7   | 0.0 |
| $\omega$ B97X-D/6-311+G(2d,2p)    | 6372.3 | 44.0   | 808.9 | 2.3   | 734.0 | 1.6   | 0.0 |
| $\omega$ B97X-D/6-311++G(2d,2p)   | 6372.5 | 44.2   | 808.9 | 2.3   | 733.9 | 1.5   | 0.0 |
| $\omega$ B97X-D/6-311G(df,pd)     | 6356.8 | 28.5   | 810.4 | 3.8   | 735.1 | 2.7   | 0.0 |
| $\omega$ B97X-D/6-311+G(df,pd)    | 6331.0 | 2.7    | 809.5 | 2.9   | 734.0 | 1.6   | 0.0 |
| $\omega$ B97X-D/6-311++G(df,pd)   | 6331.2 | 2.9    | 809.5 | 2.9   | 734.0 | 1.6   | 0.0 |
| $\omega$ B97X-D/6-311G(2df,2pd)   | 6389.3 | 61.0   | 810.9 | 4.3   | 735.8 | 3.4   | 0.0 |
| $\omega$ B97X-D/6-311+G(2df,2pd)  | 6353.4 | 25.1   | 810.1 | 3.5   | 734.6 | 2.2   | 0.0 |
| $\omega$ B97X-D/6-311++G(2df,2pd) | 6353.8 | 25.5   | 810.0 | 3.4   | 734.6 | 2.2   | 0.0 |
| $\omega$ B97X-D/6-311G(3df,3pd)   | 6381.3 | 53.0   | 811.2 | 4.6   | 736.0 | 3.6   | 0.0 |
| $\omega$ B97X-D/6-311+G(3df,3pd)  | 6360.3 | 32.0   | 810.3 | 3.7   | 734.9 | 2.5   | 0.0 |
| $\omega$ B97X-D/6-311++G(3df,3pd) | 6360.1 | 31.8   | 810.3 | 3.7   | 734.9 | 2.5   | 0.0 |
| $\omega$ B97X-D/aug-cc-pVDZ       | 6317.9 | -10.4  | 805.6 | -1.0  | 730.8 | -1.6  | 0.0 |
| $\omega$ B97X-D/aug-cc-pVTZ       | 6349.4 | 21.1   | 809.9 | 3.3   | 734.5 | 2.1   | 0.0 |
| $\omega$ B97X-D/cc-pVDZ           | 6351.9 | 23.6   | 806.9 | 0.3   | 732.3 | -0.1  | 0.0 |
| $\omega$ B97X-D/cc-pVTZ           | 6356.1 | 27.8   | 810.4 | 3.8   | 734.9 | 2.5   | 0.0 |
|                                   |        |        |       |       |       |       |     |
| MP2/6-31G(d,p)                    | 6345.4 | 17.1   | 807.6 | 1.0   | 732.6 | 0.2   | 0.0 |
| MP2/6-31+G(d,p)                   | 6282.5 | -45.8  | 805.5 | -1.1  | 730.0 | -2.4  | 0.0 |
| MP2/6-31++G(d,p)                  | 6279.8 | -48.5  | 805.6 | -1.0  | 730.1 | -2.3  | 0.0 |
| MP2/6-311G(d,p)                   | 6356.6 | 28.3   | 807.6 | 1.0   | 732.9 | 0.5   | 0.0 |

|                       |               |       |              |      |              |      |     |
|-----------------------|---------------|-------|--------------|------|--------------|------|-----|
| MP2/6-311+G(d,p)      | 6332.9        | 4.6   | 806.3        | -0.3 | 731.4        | -1.0 | 0.0 |
| MP2/6-311++G(d,p)     | 6332.9        | 4.6   | 806.3        | -0.3 | 731.4        | -1.0 | 0.0 |
| MP2/6-311G(2d,2p)     | 6427.9        | 99.6  | 809.6        | 3.0  | 735.2        | 2.8  | 0.0 |
| MP2/6-311+G(2d,2p)    | 6379.3        | 51.0  | 808.4        | 1.8  | 733.6        | 1.2  | 0.0 |
| MP2/6-311++G(2d,2p)   | 6379.7        | 51.4  | 808.4        | 1.8  | 733.6        | 1.2  | 0.0 |
| MP2/6-311G(df,pd)     | 6421.3        | 93.0  | 813.2        | 6.6  | 738.2        | 5.8  | 0.0 |
| MP2/6-311+G(df,pd)    | 6399.5        | 71.2  | 811.3        | 4.7  | 736.4        | 4.0  | 0.0 |
| MP2/6-311++G(df,pd)   | 6401.9        | 73.6  | 811.2        | 4.6  | 736.4        | 4.0  | 0.0 |
| MP2/6-311G(2df,2pd)   | 6427.8        | 99.5  | 814.6        | 8.0  | 739.4        | 7.0  | 0.0 |
| MP2/6-311+G(2df,2pd)  | 6390.9        | 62.6  | 813.1        | 6.5  | 737.6        | 5.2  | 0.0 |
| MP2/6-311++G(2df,2pd) | 6391.2        | 62.9  | 813.1        | 6.5  | 737.6        | 5.2  | 0.0 |
| MP2/6-311G(3df,3pd)   | 6409.2        | 80.9  | 814.2        | 7.6  | 738.8        | 6.4  | 0.0 |
| MP2/6-311+G(3df,3pd)  | 6384.9        | 56.6  | 812.6        | 6.0  | 737.2        | 4.8  | 0.0 |
| MP2/6-311++G(3df,3pd) | 6385.3        | 57.0  | 812.6        | 6.0  | 737.2        | 4.8  | 0.0 |
| MP2/aug-cc-pVDZ       | 6285.6        | -42.7 | 800.2        | -6.4 | 726.0        | -6.4 | 0.0 |
| MP2/aug-cc-pVTZ       | 6371.2        | 42.9  | 811.4        | 4.8  | 736.1        | 3.7  | 0.0 |
| MP2/cc-pVDZ           | 6329.5        | 1.2   | 804.2        | -2.4 | 729.9        | -2.5 | 0.0 |
| MP2/cc-pVTZ           | 6386.3        | 58.0  | 812.3        | 5.7  | 737.0        | 4.6  | 0.0 |
| <b>Expt.</b>          | <b>6328.3</b> |       | <b>806.6</b> |      | <b>732.4</b> |      |     |



**Table S-5.** Observed 172 frequencies ( $\nu_{\text{Obs.}}$ ) of conformer Maa of ethyl butyrate.  $\nu_{\text{Obs.}} - \nu_{\text{Calc.}}$  values as obtained with the program *XIAM*.

| <i>J</i>    | <i>K<sub>a</sub></i> | <i>K<sub>c</sub></i> | <i>J</i>    | <i>K<sub>a</sub></i> | <i>K<sub>c</sub></i> | $\nu_{\text{Obs.}}$ | $\nu_{\text{Obs.}} - \nu_{\text{Calc.}}$ |
|-------------|----------------------|----------------------|-------------|----------------------|----------------------|---------------------|------------------------------------------|
| upper level |                      |                      | lower level |                      |                      | MHz                 | kHz                                      |
| 2           | 1                    | 1                    | 1           | 0                    | 1                    | 7949.384            | -1.1                                     |
| 2           | 2                    | 1                    | 1           | 1                    | 0                    | 16582.677           | -3.7                                     |
| 2           | 2                    | 0                    | 2           | 1                    | 1                    | 13002.318           | 0.1                                      |
| 2           | 2                    | 1                    | 2           | 1                    | 2                    | 13105.601           | -1.2                                     |
| 3           | 0                    | 3                    | 2           | 0                    | 2                    | 5318.239            | 0.4                                      |
| 3           | 1                    | 2                    | 2           | 1                    | 1                    | 5370.710            | -2.2                                     |
| 3           | 1                    | 3                    | 2           | 1                    | 2                    | 5267.219            | 2.9                                      |
| 3           | 2                    | 2                    | 2           | 1                    | 1                    | 18321.301           | -4.2                                     |
| 3           | 2                    | 2                    | 2           | 1                    | 2                    | 18424.774           | -20.5                                    |
| 3           | 2                    | 1                    | 2           | 2                    | 0                    | 5320.002            | -10.6                                    |
| 3           | 2                    | 2                    | 2           | 2                    | 1                    | 5319.192            | -0.4                                     |
| 3           | 2                    | 1                    | 3           | 1                    | 2                    | 12951.624           | 5.7                                      |
| 3           | 2                    | 2                    | 3           | 1                    | 2                    | 12950.600           | 7.0                                      |
| 4           | 0                    | 4                    | 3           | 0                    | 3                    | 7090.001            | -0.3                                     |
| 4           | 1                    | 3                    | 3           | 0                    | 3                    | 11616.711           | 8.1                                      |
| 4           | 1                    | 3                    | 3           | 1                    | 2                    | 7160.688            | -0.3                                     |
| 4           | 1                    | 4                    | 3           | 1                    | 3                    | 7022.685            | 0.1                                      |
| 4           | 2                    | 2                    | 3           | 2                    | 1                    | 7094.121            | -0.1                                     |
| 4           | 2                    | 3                    | 3           | 2                    | 2                    | 7092.072            | 1.4                                      |
| 4           | 3                    | 2                    | 3           | 3                    | 1                    | 7092.867            | 6.9                                      |
| 4           | 2                    | 2                    | 4           | 1                    | 3                    | 12885.052           | 0.4                                      |
| 4           | 2                    | 3                    | 4           | 1                    | 3                    | 12881.978           | 2.2                                      |
| 4           | 2                    | 3                    | 4           | 1                    | 4                    | 13226.970           | 5.8                                      |
| 5           | 0                    | 5                    | 4           | 0                    | 4                    | 8860.921            | -0.5                                     |
| 5           | 1                    | 5                    | 4           | 0                    | 4                    | 12959.635           | -2.8                                     |
| 5           | 1                    | 4                    | 4           | 1                    | 3                    | 8950.436            | -0.7                                     |
| 5           | 1                    | 5                    | 4           | 1                    | 4                    | 8777.925            | 0.5                                      |
| 5           | 2                    | 4                    | 4           | 1                    | 3                    | 21746.765           | -0.2                                     |
| 5           | 2                    | 3                    | 4           | 1                    | 4                    | 22098.939           | 9.3                                      |
| 5           | 2                    | 3                    | 4           | 2                    | 2                    | 8868.889            | -0.7                                     |
| 5           | 2                    | 4                    | 4           | 2                    | 3                    | 8864.790            | 0.6                                      |
| 5           | 3                    | 2                    | 4           | 3                    | 1                    | 8866.227            | -8.9                                     |
| 5           | 3                    | 3                    | 4           | 3                    | 2                    | 8866.227            | 7.1                                      |
| 5           | 4                    | 1                    | 4           | 4                    | 0                    | 8866.369            | 1.7                                      |
| 5           | 2                    | 3                    | 5           | 1                    | 4                    | 12803.506           | 1.4                                      |
| 5           | 2                    | 4                    | 5           | 1                    | 4                    | 12796.330           | 1.5                                      |
| 5           | 2                    | 4                    | 5           | 1                    | 5                    | 13313.829           | 0.0                                      |
| 5           | 3                    | 2                    | 5           | 2                    | 3                    | 21748.743           | 13.0                                     |
| 5           | 3                    | 3                    | 5           | 2                    | 4                    | 21755.882           | -2.8                                     |
| 6           | 0                    | 6                    | 5           | 0                    | 5                    | 10630.791           | 0.3                                      |
| 6           | 1                    | 5                    | 5           | 0                    | 5                    | 15356.118           | 2.0                                      |
| 6           | 1                    | 5                    | 5           | 1                    | 4                    | 10739.898           | -1.2                                     |

|   |   |   |   |   |   |           |       |
|---|---|---|---|---|---|-----------|-------|
| 6 | 1 | 6 | 5 | 1 | 5 | 10532.880 | -0.5  |
| 6 | 2 | 4 | 5 | 2 | 3 | 10644.481 | -0.5  |
| 6 | 2 | 5 | 5 | 2 | 4 | 10637.309 | 0.1   |
| 6 | 3 | 3 | 5 | 2 | 4 | 32395.622 | 1.1   |
| 6 | 5 | 1 | 5 | 5 | 0 | 10640.148 | 4.0   |
| 5 | 3 | 2 | 6 | 2 | 4 | 11104.235 | -13.5 |
| 6 | 2 | 4 | 6 | 1 | 5 | 12708.088 | 1.1   |
| 6 | 2 | 5 | 6 | 1 | 6 | 13418.264 | 6.6   |
| 6 | 3 | 3 | 6 | 2 | 4 | 21743.968 | 4.7   |
| 6 | 3 | 4 | 6 | 2 | 5 | 21758.248 | 0.0   |
| 7 | 0 | 7 | 6 | 0 | 6 | 12399.403 | 0.1   |
| 7 | 1 | 6 | 6 | 1 | 5 | 12529.013 | -0.5  |
| 7 | 1 | 7 | 6 | 1 | 6 | 12287.500 | 0.1   |
| 7 | 2 | 5 | 6 | 2 | 4 | 12421.056 | -0.5  |
| 7 | 2 | 6 | 6 | 2 | 5 | 12409.588 | -1.1  |
| 7 | 3 | 5 | 6 | 2 | 4 | 34157.129 | -1.5  |
| 7 | 3 | 4 | 6 | 2 | 5 | 34171.642 | 2.7   |
| 7 | 3 | 4 | 6 | 3 | 3 | 12413.326 | -1.3  |
| 7 | 3 | 5 | 6 | 3 | 4 | 12413.228 | -3.3  |
| 7 | 4 | 3 | 6 | 4 | 2 | 12413.138 | -1.0  |
| 7 | 5 | 2 | 6 | 5 | 1 | 12413.546 | 0.8   |
| 7 | 5 | 3 | 6 | 5 | 2 | 12413.546 | 0.8   |
| 7 | 6 | 1 | 6 | 6 | 0 | 12414.241 | -5.8  |
| 7 | 2 | 6 | 7 | 1 | 7 | 13540.349 | 2.4   |
| 7 | 3 | 4 | 7 | 2 | 5 | 21736.237 | 3.0   |
| 7 | 3 | 5 | 7 | 2 | 6 | 21761.891 | 0.8   |
| 8 | 0 | 8 | 7 | 0 | 7 | 14166.557 | -0.2  |
| 8 | 0 | 8 | 7 | 1 | 7 | 10277.654 | -0.2  |
| 8 | 1 | 7 | 7 | 1 | 6 | 14317.714 | -1.5  |
| 8 | 1 | 8 | 7 | 1 | 7 | 14041.732 | -0.1  |
| 8 | 2 | 6 | 7 | 1 | 7 | 27764.936 | 3.2   |
| 8 | 2 | 6 | 7 | 2 | 5 | 14198.769 | -1.0  |
| 8 | 2 | 7 | 7 | 2 | 6 | 14181.589 | -1.0  |
| 8 | 3 | 6 | 7 | 2 | 5 | 35922.979 | -4.5  |
| 8 | 3 | 5 | 7 | 2 | 6 | 35949.153 | 1.1   |
| 8 | 3 | 5 | 7 | 3 | 4 | 14187.101 | -0.6  |
| 8 | 3 | 6 | 7 | 3 | 5 | 14186.908 | -1.6  |
| 8 | 4 | 4 | 7 | 4 | 3 | 14186.605 | -0.5  |
| 8 | 5 | 3 | 7 | 5 | 2 | 14186.967 | 0.2   |
| 8 | 5 | 4 | 7 | 5 | 3 | 14186.967 | 0.2   |
| 8 | 6 | 2 | 7 | 6 | 1 | 14187.719 | 4.2   |
| 8 | 7 | 2 | 7 | 7 | 1 | 14188.741 | 6.7   |
| 8 | 2 | 6 | 8 | 1 | 7 | 12481.187 | 2.6   |
| 8 | 2 | 7 | 8 | 1 | 8 | 13680.206 | 1.5   |
| 8 | 3 | 5 | 8 | 2 | 6 | 21724.571 | 5.3   |
| 8 | 3 | 6 | 8 | 2 | 7 | 21767.213 | 3.2   |
| 9 | 0 | 9 | 8 | 0 | 8 | 15932.060 | -0.5  |

|    |   |    |    |   |    |           |      |
|----|---|----|----|---|----|-----------|------|
| 9  | 0 | 9  | 8  | 1 | 8  | 12167.980 | -2.5 |
| 9  | 1 | 8  | 8  | 1 | 7  | 16105.937 | -1.1 |
| 9  | 1 | 9  | 8  | 1 | 8  | 15795.529 | 0.1  |
| 9  | 2 | 8  | 8  | 1 | 7  | 28391.457 | -2.8 |
| 9  | 2 | 7  | 8  | 2 | 6  | 15977.768 | -0.7 |
| 9  | 2 | 8  | 8  | 2 | 7  | 15953.269 | -2.6 |
| 9  | 3 | 6  | 8  | 3 | 5  | 15961.066 | -2.9 |
| 9  | 3 | 7  | 8  | 3 | 6  | 15960.717 | 0.2  |
| 9  | 4 | 5  | 8  | 4 | 4  | 15960.135 | -1.7 |
| 9  | 4 | 6  | 8  | 4 | 5  | 15960.135 | 0.1  |
| 9  | 5 | 4  | 8  | 5 | 3  | 15960.412 | 0.4  |
| 9  | 5 | 5  | 8  | 5 | 4  | 15960.412 | 0.4  |
| 9  | 6 | 3  | 8  | 6 | 2  | 15961.187 | 2.6  |
| 9  | 7 | 2  | 8  | 7 | 1  | 15962.297 | 6.1  |
| 9  | 2 | 7  | 9  | 1 | 8  | 12353.016 | 0.9  |
| 9  | 2 | 8  | 9  | 1 | 9  | 13837.947 | -0.1 |
| 9  | 3 | 7  | 9  | 2 | 8  | 21774.654 | -1.0 |
| 10 | 0 | 10 | 9  | 0 | 9  | 17695.731 | -0.5 |
| 10 | 1 | 9  | 9  | 1 | 8  | 17893.610 | -1.0 |
| 10 | 1 | 10 | 9  | 1 | 9  | 17548.843 | -1.9 |
| 10 | 2 | 8  | 9  | 2 | 7  | 17758.188 | 0.0  |
| 10 | 2 | 9  | 9  | 2 | 8  | 17724.593 | -0.9 |
| 10 | 3 | 7  | 9  | 3 | 6  | 17735.260 | -3.4 |
| 10 | 3 | 8  | 9  | 3 | 7  | 17734.657 | -2.8 |
| 10 | 6 | 4  | 9  | 6 | 3  | 17734.657 | 1.0  |
| 10 | 6 | 5  | 9  | 6 | 4  | 17734.657 | 1.0  |
| 10 | 7 | 3  | 9  | 7 | 2  | 17735.841 | 6.0  |
| 10 | 7 | 4  | 9  | 7 | 3  | 17735.841 | 6.0  |
| 10 | 2 | 8  | 10 | 1 | 9  | 12217.592 | -0.1 |
| 10 | 2 | 9  | 10 | 1 | 10 | 14013.693 | -3.2 |
| 10 | 3 | 8  | 10 | 2 | 9  | 21784.720 | -0.9 |
| 11 | 0 | 11 | 10 | 0 | 10 | 19457.405 | 0.0  |
| 11 | 1 | 10 | 10 | 1 | 9  | 19680.660 | 0.0  |
| 11 | 1 | 11 | 10 | 1 | 10 | 19301.637 | -0.5 |
| 11 | 2 | 9  | 10 | 1 | 9  | 31757.739 | 0.5  |
| 11 | 2 | 10 | 10 | 1 | 10 | 33509.221 | 8.0  |
| 11 | 2 | 9  | 10 | 2 | 8  | 19540.147 | 0.5  |
| 11 | 2 | 10 | 10 | 2 | 9  | 19495.516 | -0.9 |
| 11 | 2 | 9  | 11 | 1 | 10 | 12077.079 | 0.5  |
| 11 | 2 | 10 | 11 | 1 | 11 | 14207.567 | -8.5 |
| 12 | 0 | 12 | 11 | 0 | 11 | 21216.936 | -1.0 |
| 12 | 1 | 11 | 11 | 1 | 10 | 21467.006 | -0.9 |
| 12 | 1 | 12 | 11 | 1 | 11 | 21053.867 | -0.8 |
| 12 | 2 | 10 | 11 | 1 | 10 | 33400.819 | -0.8 |
| 12 | 2 | 10 | 11 | 2 | 9  | 21323.738 | -3.3 |
| 12 | 2 | 11 | 11 | 2 | 10 | 21265.998 | -2.6 |
| 12 | 2 | 10 | 12 | 1 | 11 | 11933.815 | 2.1  |

|    |   |    |    |   |    |           |      |
|----|---|----|----|---|----|-----------|------|
| 12 | 2 | 11 | 12 | 1 | 12 | 14419.700 | -8.4 |
| 12 | 3 | 10 | 12 | 2 | 11 | 21814.911 | -0.3 |
| 13 | 0 | 13 | 12 | 0 | 12 | 22974.209 | -1.4 |
| 13 | 1 | 12 | 12 | 1 | 11 | 23252.568 | -0.8 |
| 13 | 1 | 13 | 12 | 1 | 12 | 22805.501 | 1.0  |
| 13 | 1 | 12 | 12 | 2 | 11 | 11522.222 | 8.3  |
| 13 | 2 | 11 | 12 | 2 | 10 | 23109.038 | -4.3 |
| 13 | 2 | 12 | 12 | 2 | 11 | 23036.001 | -4.2 |
| 13 | 2 | 11 | 13 | 1 | 12 | 11790.287 | 0.6  |
| 13 | 2 | 12 | 13 | 1 | 13 | 14650.210 | -3.6 |
| 13 | 3 | 11 | 13 | 2 | 12 | 21836.232 | 0.9  |
| 14 | 1 | 14 | 13 | 0 | 13 | 27549.611 | -3.9 |
| 14 | 2 | 12 | 14 | 1 | 13 | 11649.118 | 2.5  |
| 14 | 3 | 12 | 14 | 2 | 13 | 21862.553 | -1.6 |
| 15 | 2 | 13 | 14 | 2 | 12 | 26684.873 | -1.5 |
| 15 | 2 | 13 | 15 | 1 | 14 | 11513.011 | 1.7  |
| 15 | 3 | 13 | 15 | 2 | 14 | 21894.559 | -0.1 |
| 16 | 0 | 16 | 15 | 0 | 15 | 28231.818 | 0.3  |
| 16 | 1 | 15 | 15 | 1 | 14 | 28603.639 | 0.3  |
| 16 | 2 | 14 | 15 | 2 | 13 | 28475.369 | 6.1  |
| 16 | 2 | 15 | 15 | 2 | 14 | 28342.745 | -3.4 |
| 16 | 2 | 14 | 16 | 1 | 15 | 11384.734 | 0.5  |
| 16 | 3 | 14 | 16 | 2 | 15 | 21932.949 | 3.2  |
| 17 | 0 | 17 | 16 | 0 | 16 | 29979.593 | -1.0 |
| 17 | 0 | 17 | 16 | 1 | 16 | 27509.266 | 7.1  |
| 17 | 2 | 15 | 16 | 2 | 14 | 30267.465 | -1.5 |
| 17 | 2 | 16 | 16 | 2 | 15 | 30110.439 | -3.0 |
| 17 | 2 | 15 | 17 | 1 | 16 | 11267.071 | -2.1 |
| 17 | 3 | 15 | 17 | 2 | 16 | 21978.430 | -5.6 |
| 18 | 2 | 16 | 18 | 1 | 17 | 11162.794 | 0.2  |
| 18 | 3 | 16 | 18 | 2 | 17 | 22031.763 | -1.1 |
| 19 | 2 | 17 | 19 | 1 | 18 | 11074.608 | 1.0  |
| 19 | 3 | 17 | 19 | 2 | 18 | 22093.671 | -6.3 |
| 20 | 2 | 18 | 20 | 1 | 19 | 11005.136 | -2.5 |
| 21 | 2 | 19 | 21 | 1 | 20 | 10956.904 | -0.2 |
| 24 | 2 | 22 | 24 | 1 | 23 | 10962.807 | 1.6  |

**Table S-6.** Observed 117 frequencies ( $\nu_{\text{Obs.}}$ ) of conformer aaa of ethyl butyrate.  $\nu_{\text{Obs.}} - \nu_{\text{Calc.}}$  values as obtained with the program *XIAM*.

| <i>J</i>    | <i>K<sub>a</sub></i> | <i>K<sub>c</sub></i> | <i>J</i>    | <i>K<sub>a</sub></i> | <i>K<sub>c</sub></i> | $\nu_{\text{Obs.}}$ | $\nu_{\text{Obs.}} - \nu_{\text{Calc.}}$ |
|-------------|----------------------|----------------------|-------------|----------------------|----------------------|---------------------|------------------------------------------|
| upper level |                      |                      | lower level |                      |                      | MHz                 | kHz                                      |
| 2           | 2                    | 0                    | 2           | 1                    | 1                    | 16565.566           | 1.5                                      |
| 3           | 1                    | 3                    | 2           | 0                    | 2                    | 9953.295            | -3.6                                     |
| 3           | 2                    | 1                    | 3           | 1                    | 2                    | 16457.671           | -3.2                                     |
| 3           | 2                    | 2                    | 3           | 1                    | 3                    | 16899.294           | 6.7                                      |
| 3           | 2                    | 2                    | 4           | 1                    | 3                    | 10151.151           | -5.4                                     |
| 4           | 1                    | 3                    | 4           | 0                    | 4                    | 5939.084            | 5.4                                      |
| 4           | 2                    | 2                    | 4           | 1                    | 3                    | 16317.581           | -4.4                                     |
| 4           | 2                    | 3                    | 4           | 1                    | 4                    | 17048.640           | 9.5                                      |
| 5           | 0                    | 5                    | 4           | 0                    | 4                    | 7679.976            | 1.1                                      |
| 5           | 1                    | 5                    | 4           | 0                    | 4                    | 12702.953           | 1.9                                      |
| 5           | 1                    | 4                    | 4           | 1                    | 3                    | 7877.074            | 1.1                                      |
| 5           | 1                    | 5                    | 4           | 1                    | 4                    | 7506.056            | -5.6                                     |
| 5           | 1                    | 4                    | 5           | 0                    | 5                    | 6136.178            | 1.4                                      |
| 5           | 2                    | 3                    | 5           | 1                    | 4                    | 16148.523           | -5.4                                     |
| 5           | 2                    | 4                    | 5           | 1                    | 5                    | 17235.748           | 5.7                                      |
| 5           | 3                    | 2                    | 5           | 2                    | 3                    | 27773.730           | 4.6                                      |
| 6           | 0                    | 6                    | 5           | 0                    | 5                    | 9207.845            | 1.1                                      |
| 6           | 1                    | 6                    | 5           | 0                    | 5                    | 14028.267           | -5.5                                     |
| 6           | 1                    | 5                    | 5           | 1                    | 4                    | 9450.365            | 0.0                                      |
| 6           | 1                    | 6                    | 5           | 1                    | 5                    | 9005.296            | -0.3                                     |
| 6           | 1                    | 5                    | 6           | 0                    | 6                    | 6378.702            | 4.4                                      |
| 6           | 2                    | 5                    | 6           | 1                    | 6                    | 17460.890           | 4.0                                      |
| 6           | 3                    | 3                    | 6           | 2                    | 4                    | 27755.370           | 0.2                                      |
| 7           | 0                    | 7                    | 6           | 0                    | 6                    | 10731.353           | 1.3                                      |
| 7           | 1                    | 7                    | 6           | 0                    | 6                    | 15323.921           | -1.2                                     |
| 7           | 1                    | 6                    | 6           | 1                    | 5                    | 11022.457           | 0.6                                      |
| 7           | 1                    | 7                    | 6           | 1                    | 6                    | 10503.496           | 2.3                                      |
| 7           | 2                    | 5                    | 6           | 2                    | 4                    | 10808.339           | 1.8                                      |
| 7           | 2                    | 6                    | 6           | 2                    | 5                    | 10766.963           | 2.1                                      |
| 7           | 1                    | 6                    | 7           | 0                    | 7                    | 6669.805            | 2.7                                      |
| 7           | 2                    | 5                    | 7           | 1                    | 6                    | 15740.416           | 0.8                                      |
| 7           | 2                    | 6                    | 7           | 1                    | 7                    | 17724.352           | -1.2                                     |
| 7           | 3                    | 4                    | 7           | 2                    | 5                    | 27726.263           | 1.9                                      |
| 7           | 3                    | 5                    | 7           | 2                    | 6                    | 27818.583           | 4.5                                      |
| 8           | 0                    | 8                    | 7           | 0                    | 7                    | 12249.869           | 1.5                                      |
| 8           | 1                    | 7                    | 7           | 1                    | 6                    | 12593.111           | 0.1                                      |
| 8           | 1                    | 8                    | 7           | 1                    | 7                    | 12000.517           | 2.0                                      |
| 8           | 2                    | 7                    | 7           | 1                    | 6                    | 27949.729           | -4.8                                     |
| 8           | 2                    | 6                    | 7           | 2                    | 5                    | 12364.420           | 0.4                                      |
| 8           | 2                    | 7                    | 7           | 2                    | 6                    | 12302.614           | 1.6                                      |
| 7           | 3                    | 5                    | 8           | 2                    | 6                    | 15360.870           | 4.8                                      |
| 7           | 3                    | 4                    | 8           | 2                    | 7                    | 15516.945           | 2.5                                      |

---

|    |   |    |    |   |    |           |       |
|----|---|----|----|---|----|-----------|-------|
| 8  | 1 | 7  | 8  | 0 | 8  | 7013.051  | 5.3   |
| 8  | 2 | 6  | 8  | 1 | 7  | 15511.720 | -3.9  |
| 8  | 2 | 7  | 8  | 1 | 8  | 18026.449 | -1.6  |
| 8  | 3 | 5  | 8  | 2 | 6  | 27683.065 | 3.0   |
| 8  | 3 | 6  | 8  | 2 | 7  | 27836.001 | -14.8 |
| 9  | 0 | 9  | 8  | 0 | 8  | 13762.842 | 1.3   |
| 9  | 1 | 9  | 8  | 1 | 8  | 13496.238 | 1.8   |
| 9  | 2 | 8  | 8  | 2 | 7  | 13837.273 | 1.7   |
| 9  | 3 | 6  | 8  | 3 | 5  | 13864.150 | -0.3  |
| 8  | 3 | 6  | 9  | 2 | 7  | 13755.878 | 5.1   |
| 9  | 1 | 8  | 9  | 0 | 9  | 7412.282  | 1.6   |
| 9  | 2 | 7  | 9  | 1 | 8  | 15274.689 | -1.4  |
| 9  | 2 | 8  | 9  | 1 | 9  | 18367.480 | -5.8  |
| 9  | 3 | 6  | 9  | 2 | 7  | 27622.170 | -0.2  |
| 9  | 3 | 7  | 9  | 2 | 8  | 27860.737 | -13.5 |
| 10 | 0 | 10 | 9  | 0 | 9  | 15269.835 | 2.0   |
| 10 | 0 | 10 | 9  | 1 | 9  | 11193.221 | 1.5   |
| 10 | 1 | 10 | 9  | 1 | 9  | 14990.551 | 1.2   |
| 10 | 2 | 9  | 9  | 2 | 8  | 15370.817 | 1.4   |
| 10 | 3 | 8  | 9  | 3 | 7  | 15404.526 | 0.9   |
| 9  | 3 | 6  | 10 | 2 | 9  | 12494.224 | -2.2  |
| 10 | 1 | 9  | 10 | 0 | 10 | 7871.523  | -2.2  |
| 10 | 2 | 8  | 10 | 1 | 9  | 15036.130 | 2.3   |
| 10 | 2 | 9  | 10 | 1 | 10 | 18747.751 | -0.5  |
| 10 | 3 | 7  | 10 | 2 | 8  | 27539.852 | 0.6   |
| 10 | 3 | 8  | 10 | 2 | 9  | 27894.457 | -2.9  |
| 11 | 0 | 11 | 10 | 0 | 10 | 16770.552 | 1.2   |
| 11 | 0 | 11 | 10 | 1 | 10 | 12973.219 | -1.6  |
| 11 | 1 | 10 | 10 | 1 | 9  | 17293.824 | 0.2   |
| 11 | 1 | 11 | 10 | 1 | 10 | 16483.367 | 0.7   |
| 11 | 2 | 9  | 10 | 2 | 8  | 17061.003 | 0.1   |
| 11 | 2 | 10 | 10 | 2 | 9  | 16903.125 | 0.8   |
| 10 | 3 | 8  | 11 | 2 | 9  | 10470.893 | 7.0   |
| 10 | 3 | 7  | 11 | 2 | 10 | 10999.295 | -3.3  |
| 11 | 1 | 10 | 11 | 0 | 11 | 8394.795  | -3.1  |
| 11 | 2 | 9  | 11 | 1 | 10 | 14803.311 | 4.2   |
| 11 | 2 | 10 | 11 | 1 | 11 | 19167.510 | 0.6   |
| 11 | 3 | 8  | 11 | 2 | 9  | 27432.403 | -3.8  |
| 11 | 3 | 9  | 11 | 2 | 10 | 27938.943 | 4.5   |
| 12 | 0 | 12 | 11 | 0 | 11 | 18264.876 | 1.1   |
| 12 | 0 | 12 | 11 | 1 | 11 | 14754.727 | -2.1  |
| 12 | 1 | 11 | 11 | 1 | 10 | 18855.995 | -1.5  |
| 12 | 1 | 12 | 11 | 1 | 11 | 17974.614 | -0.7  |
| 12 | 2 | 10 | 11 | 2 | 9  | 18636.493 | -0.1  |
| 12 | 2 | 11 | 11 | 2 | 10 | 18434.076 | -1.6  |
| 12 | 1 | 11 | 12 | 0 | 12 | 8985.926  | 6.3   |
| 12 | 2 | 10 | 12 | 1 | 11 | 14583.803 | -0.4  |

---

|    |   |    |    |   |    |           |      |
|----|---|----|----|---|----|-----------|------|
| 12 | 2 | 11 | 12 | 1 | 12 | 19626.966 | -6.4 |
| 12 | 3 | 9  | 12 | 2 | 10 | 27296.373 | 0.1  |
| 12 | 3 | 10 | 12 | 2 | 11 | 27996.070 | -7.0 |
| 13 | 1 | 12 | 12 | 1 | 11 | 20415.255 | 1.6  |
| 13 | 2 | 11 | 12 | 2 | 10 | 20216.773 | -2.4 |
| 13 | 2 | 12 | 12 | 2 | 11 | 19963.562 | 3.1  |
| 13 | 2 | 11 | 13 | 1 | 12 | 14385.324 | -1.5 |
| 13 | 2 | 12 | 13 | 1 | 13 | 20126.287 | -0.9 |
| 13 | 3 | 10 | 13 | 2 | 11 | 27128.750 | 5.6  |
| 13 | 3 | 11 | 13 | 2 | 12 | 28067.841 | 0.0  |
| 14 | 1 | 13 | 14 | 0 | 14 | 10384.679 | 2.9  |
| 14 | 2 | 12 | 14 | 1 | 13 | 14215.533 | -1.0 |
| 14 | 2 | 13 | 14 | 1 | 14 | 20665.520 | -1.3 |
| 14 | 3 | 11 | 14 | 2 | 12 | 26927.212 | 8.6  |
| 14 | 3 | 12 | 14 | 2 | 13 | 28156.249 | 0.4  |
| 15 | 2 | 13 | 15 | 1 | 14 | 14081.881 | 5.5  |
| 15 | 3 | 12 | 15 | 2 | 13 | 26690.337 | 0.2  |
| 15 | 3 | 13 | 15 | 2 | 14 | 28263.344 | -4.1 |
| 16 | 2 | 14 | 16 | 1 | 15 | 13991.440 | -1.9 |
| 17 | 2 | 15 | 17 | 1 | 16 | 13950.867 | -4.0 |
| 18 | 2 | 16 | 18 | 1 | 17 | 13966.289 | -4.8 |
| 19 | 2 | 17 | 19 | 1 | 18 | 14043.325 | -0.2 |
| 20 | 2 | 18 | 20 | 1 | 19 | 14187.100 | 14.0 |
| 21 | 2 | 19 | 21 | 1 | 20 | 14402.242 | 1.0  |
| 22 | 2 | 20 | 22 | 1 | 21 | 14693.027 | -6.5 |
| 23 | 2 | 21 | 23 | 1 | 22 | 15063.301 | 0.2  |
| 24 | 2 | 22 | 24 | 1 | 23 | 15516.457 | -0.8 |
| 25 | 2 | 23 | 25 | 1 | 24 | 16055.446 | 2.0  |

**Table S-7.** Overview of different carbonyl compounds investigated to probe for the sensitivity of the dihedral predictions at different levels of theory (see Figure 5 and text). Molecules are numbered according to Figure 5.

|      | MP2/6-311++Gdp |      |        |        | MP2/cc-pVDZ |      |        |        | B3LYP-D3BJ/cc-pVDZ |      |        |        |       |
|------|----------------|------|--------|--------|-------------|------|--------|--------|--------------------|------|--------|--------|-------|
|      | Θ              | Exp. | Calc.  | %      | Θ           | Exp. | Calc.  | %      | Θ                  | Exp. | Calc.  | %      |       |
| (1)  | 33.7           | A    | 6059.3 | 5520.6 | 8.9         | 15.9 | 6059.3 | 6046.6 | 0.2                | 13.3 | 6059.3 | 6168.8 | -1.8  |
|      |                | B    | 1421.3 | 1451.6 | -2.1        |      | 1421.3 | 1428.7 | -0.5               |      | 1421.3 | 1413.0 | 0.6   |
|      |                | C    | 1333.3 | 1414.3 | -6.1        |      | 1333.3 | 1327.7 | 0.4                |      | 1333.3 | 1309.4 | 1.8   |
| (2)  | 33.5           | A    | 5063.2 | 4407.0 | 13.0        | 14   | 5063.2 | 5060.9 | 0.0                | 12.1 | 5063.2 | 5204.8 | -2.8  |
|      |                | B    | 897.7  | 932.3  | -3.9        |      | 897.7  | 900.9  | -0.4               |      | 897.7  | 890.0  | 0.9   |
|      |                | C    | 846.4  | 897.4  | -6.0        |      | 846.4  | 844.0  | 0.3                |      | 846.4  | 832.1  | 1.7   |
| (3)  | 34.7           | A    | 3599.0 | 3101.3 | 13.8        | 15.1 | 3599.0 | 3598.9 | 0.0                | 12   | 3599.0 | 3711.7 | -3.1  |
|      |                | B    | 625.4  | 664.2  | -6.2        |      | 625.4  | 626.6  | -0.2               |      | 625.4  | 617.3  | 1.3   |
|      |                | C    | 585.8  | 616.4  | -5.2        |      | 585.8  | 584.6  | 0.2                |      | 585.8  | 576.5  | 1.6   |
| (4)  | 34.7           | A    | 5238.1 | 4571.6 | 12.7        | 16.2 | 5238.1 | 5259.6 | -0.4               | 13.6 | 5238.1 | 5366.4 | -2.4  |
|      |                | B    | 903.8  | 941.4  | -4.2        |      | 903.8  | 904.4  | -0.1               |      | 903.8  | 895.2  | 0.9   |
|      |                | C    | 869.3  | 916.5  | -5.4        |      | 869.3  | 865.6  | 0.4                |      | 869.3  | 854.4  | 1.7   |
| (5)  | 36.8           | A    | 4437.2 | 3509.1 | 20.9        | 15.4 | 4437.2 | 4471.3 | -0.8               | 12.4 | 4437.2 | 4618.4 | -4.1  |
|      |                | B    | 612.2  | 653.7  | -6.8        |      | 612.2  | 612.6  | -0.1               |      | 612.2  | 605.5  | 1.1   |
|      |                | C    | 595.8  | 639.1  | -7.3        |      | 595.8  | 592.8  | 0.5                |      | 595.8  | 584.4  | 1.9   |
| (6)  | 59             | A    | 4013.5 | 3378.5 | 15.8        | 17.8 | 4013.5 | 4040.7 | -0.7               | 15.3 | 4013.5 | 4052.2 | -1.0  |
|      |                | B    | 681.6  | 751.3  | -10.2       |      | 681.6  | 680.6  | 0.1                |      | 681.6  | 677.5  | 0.6   |
|      |                | C    | 649.3  | 708.1  | -9.1        |      | 649.3  | 644.0  | 0.8                |      | 649.3  | 638.4  | 1.7   |
| (11) | 52             | A    | 2604.5 | 2480.4 | 4.8         | 25.5 | 2604.5 | 2745.3 | -5.4               | 22.5 | 2604.5 | 2775.2 | -6.6  |
|      |                | B    | 885.4  | 913.5  | -3.2        |      | 885.4  | 871.5  | 1.6                |      | 885.4  | 865.4  | 2.3   |
|      |                | C    | 795    | 813.2  | -2.3        |      | 795    | 772.5  | 2.8                |      | 795    | 764.1  | 3.9   |
| (12) | 58.5           | A    | 2007.2 | 1680.9 | 16.3        | 25.3 | 2007.2 | 2253.7 | -12.3              | 21.5 | 2007.2 | 2315.7 | -15.4 |
|      |                | B    | 654.1  | 734.0  | -12.2       |      | 654.1  | 621.4  | 5.0                |      | 654.1  | 613.3  | 6.2   |
|      |                | C    | 566.4  | 593.6  | -4.8        |      | 566.4  | 547.7  | 3.3                |      | 566.4  | 541.0  | 4.5   |
| (7)  | 19.2           | A    | 6554.0 | 6480.0 | 1.1         | 11.2 | 6554.0 | 6301.0 | 3.9                | 11.5 | 6554.0 | 6546.8 | 0.1   |
|      |                | B    | 2148.0 | 2156.0 | -0.4        |      | 2148.0 | 2169.0 | -1.0               |      | 2148.0 | 2140.8 | 0.3   |
|      |                | C    | 1927.0 | 1925.0 | 0.1         |      | 1927.0 | 1975.0 | -2.5               |      | 1927.0 | 1914.5 | 0.6   |
| (8)  | 19.4           | A    | 5864.8 | 5573.0 | 5.0         | 11.7 | 5864.8 | 5801.0 | 1.1                | 11   | 5864.8 | 5864.6 | 0.0   |
|      |                | B    | 1244.4 | 1259.0 | -1.2        |      | 1244.4 | 1248.0 | -0.3               |      | 1244.4 | 1239.5 | 0.4   |
|      |                | C    | 1153.4 | 1181.0 | -2.4        |      | 1153.4 | 1154.0 | -0.1               |      | 1153.4 | 1147.1 | 0.5   |
| (9)  | 19             | A    | 4465.2 | 4217.0 | 5.6         | 11.6 | 4465.2 | 4409.0 | 1.3                | 11.0 | 4465.2 | 4465.3 | 0.0   |
|      |                | B    | 808.2  | 822.0  | -1.7        |      | 808.2  | 811.0  | -0.3               |      | 808.2  | 804.8  | 0.4   |
|      |                | C    | 766.2  | 784.0  | -2.3        |      | 766.2  | 767.0  | -0.1               |      | 766.2  | 761.5  | 0.6   |
| (10) | 18.9           | A    | 4184.0 | 3962.0 | 5.3         | 11.6 | 4184.0 | 4139.0 | 1.1                | 11.0 | 4184.0 | 4183.0 | 0.0   |
|      |                | B    | 528.0  | 536.0  | -1.5        |      | 528.0  | 529.0  | -0.2               |      | 528.0  | 526.0  | 0.4   |
|      |                | C    | 508.0  | 517.0  | -1.8        |      | 508.0  | 508.0  | 0.0                |      | 508.0  | 505.0  | 0.6   |
| (14) | 7.7            | A    | 4336.7 | 4305.9 | 0.7         | 4.0  | 4336.7 | 4291.4 | 1.0                | 2.7  | 4336.7 | 4313.6 | 0.5   |
|      |                | B    | 473.9  | 475.7  | -0.4        |      | 473.9  | 475.1  | -0.3               |      | 473.9  | 472.9  | 0.2   |
|      |                | C    | 450.0  | 451.9  | -0.4        |      | 450.0  | 450.1  | 0.0                |      | 450.0  | 447.9  | 0.5   |



|      |   |   |        |        |      |   |        |        |      |   |        |        |     |
|------|---|---|--------|--------|------|---|--------|--------|------|---|--------|--------|-----|
| (13) | - | A | 1525.3 | 1527.5 | -0.1 | - | 1525.3 | 1517.7 | 0.5  | - | 1525.3 | 1509.4 | 1.0 |
|      |   | B | 894.2  | 897.6  | -0.4 |   | 894.2  | 893.7  | 0.1  |   | 894.2  | 886.3  | 0.9 |
|      |   | C | 675.5  | 679.2  | -0.5 |   | 675.5  | 677.4  | -0.3 |   | 675.5  | 673.0  | 0.4 |

Table S-7. Continued.

|      |      |   | B3LYP/cc-pVDZ |        |       | B3LYP-D3BJ/6-311++G(d,p) |        |        |       |
|------|------|---|---------------|--------|-------|--------------------------|--------|--------|-------|
|      |      |   | ⊖             | Exp.   | Calc. | %                        | ⊖      | Exp.   | Calc. |
| (1)  | 12.0 | A | 6059.3        | 6222.8 | -2.7  | 23.1                     | 6059.3 | 5908.0 | 2.5   |
|      |      | B | 1421.3        | 1397.5 | 1.7   |                          | 1421.3 | 1413.0 | 0.6   |
|      |      | C | 1333.3        | 1293.8 | 3.0   |                          | 1333.3 | 1341.5 | -0.6  |
| (2)  | 11.2 | A | 5063.2        | 5276.3 | -4.2  | 22.9                     | 5063.2 | 4890.1 | 3.4   |
|      |      | B | 897.7         | 877.4  | 2.3   |                          | 897.7  | 894.8  | 0.3   |
|      |      | C | 846.4         | 821.6  | 2.9   |                          | 846.4  | 851.2  | -0.6  |
| (3)  | 11.1 | A | 3599.0        | 3786.5 | -5.2  | 23                       | 3599.0 | 3461.6 | 3.8   |
|      |      | B | 625.4         | 606.1  | 3.1   |                          | 625.4  | 626.2  | -0.1  |
|      |      | C | 585.8         | 568.1  | 3.0   |                          | 585.8  | 587.7  | -0.3  |
| (4)  | 12.6 | A | 5238.1        | 5404.6 | -3.2  | 23.5                     | 5238.1 | 5010.8 | 4.3   |
|      |      | B | 903.8         | 886.9  | 1.9   |                          | 903.8  | 903.6  | 0.0   |
|      |      | C | 869.3         | 845.4  | 2.7   |                          | 869.3  | 874.5  | -0.6  |
| (5)  | 13.9 | A | 4013.5        | 4047.0 | -0.8  | 17.8                     | 4013.5 | 3892   | 3.0   |
|      |      | B | 681.6         | 673.0  | 1.3   |                          | 681.6  | 679.4  | 0.3   |
|      |      | C | 649.3         | 633.1  | 2.5   |                          | 649.3  | 657.1  | -1.2  |
| (6)  | 11.5 | A | 4437.2        | 4686.3 | -5.6  | 23.4                     | 4437.2 | 4148   | 6.5   |
|      |      | B | 612.2         | 598.1  | 2.3   |                          | 612.2  | 612.8  | -0.1  |
|      |      | C | 595.8         | 577.3  | 3.1   |                          | 595.8  | 603.2  | -1.2  |
| (11) | 23.1 | A | 2604.5        | 2756.6 | -5.8  | 44.8                     | 2604.5 | 2530.2 | 2.9   |
|      |      | B | 885.4         | 859.0  | 3.0   |                          | 885.4  | 885.6  | 0.0   |
|      |      | C | 795.0         | 760.5  | 4.3   |                          | 795    | 797.0  | -0.3  |
| (12) | 22.1 | A | 2007.2        | 2297.8 | -14.5 | 47                       | 2007.2 | 1866.3 | 7.0   |
|      |      | B | 654.1         | 608.5  | 7.0   |                          | 654.1  | 670.6  | -2.5  |
|      |      | C | 566.4         | 538.0  | 5.0   |                          | 566.4  | 571.6  | -0.9  |
| (7)  | 10.6 | A | 6554.0        | 6590   | -0.5  | 15.7                     | 6554.0 | 6453.4 | 1.5   |
|      |      | B | 2148.0        | 2115   | 1.5   |                          | 2148.0 | 2137.4 | 0.5   |
|      |      | C | 1927.0        | 1892   | 1.8   |                          | 1927.0 | 1933.5 | -0.3  |
| (8)  | 10.3 | A | 5864.8        | 5914   | -0.8  | 15.3                     | 5864.8 | 5759.5 | 1.8   |
|      |      | B | 1244.4        | 1223   | 1.7   |                          | 1244.4 | 1237.9 | 0.5   |
|      |      | C | 1153.4        | 1133   | 1.8   |                          | 1153.4 | 1155   | -0.1  |
| (9)  | 10.0 | A | 4465.2        | 4535.0 | -1.6  | 15.7                     | 4465.2 | 4365.0 | 2.2   |
|      |      | B | 808.2         | 791.0  | 2.1   |                          | 808.2  | 805.0  | 0.4   |
|      |      | C | 766.2         | 750.0  | 2.1   |                          | 766.2  | 767.0  | -0.1  |
| (10) | 10.0 | A | 4184.0        | 4236.0 | -1.2  | 15.6                     | 4184.0 | 4097.0 | 2.1   |
|      |      | B | 528.0         | 518.0  | 1.9   |                          | 528.0  | 526.0  | 0.4   |
|      |      | C | 508.0         | 498.0  | 2.0   |                          | 508.0  | 507.0  | 0.2   |

|      |     |   |        |        |     |     |        |        |      |
|------|-----|---|--------|--------|-----|-----|--------|--------|------|
| (14) | 2.7 | A | 4336.7 | 4338.1 | 0.0 | 6.1 | 4336.7 | 4340.4 | -0.1 |
|      |     | B | 473.9  | 467.1  | 1.4 |     | 473.9  | 469.7  | 0.9  |
|      |     | C | 450.0  | 443.1  | 1.5 |     | 450.0  | 446.0  | 0.9  |
| (13) | -   | A | 1525.3 | 1495.7 | 1.9 | -   | 1525.3 | 1511.0 | 0.9  |
|      |     | B | 894.2  | 875.1  | 2.1 |     | 894.2  | 886.0  | 0.9  |
|      |     | C | 675.5  | 665.8  | 1.4 |     | 675.5  | 671.6  | 0.6  |

**Table S-8.** The rotational constants  $A$ ,  $B$ ,  $C$  (in MHz) of the  $C_1$  conformer of ethyl 2-methylbutyrate calculated at different levels of theory and their deviations to the experimental values (calc.–exp.)  $\Delta A$ ,  $\Delta B$ , and  $\Delta C$ , respectively (in MHz). The  $\Theta$  angle (in degree) is also given.

| Level of theory            | $A$    | $\Delta A$ | $B$   | $\Delta B$ | $C$   | $\Delta C$ | $\Theta$ |
|----------------------------|--------|------------|-------|------------|-------|------------|----------|
| B3LYP-D3/6-31G(d,p)        | 2765.6 | 161.1      | 866.6 | -18.8      | 764.7 | -30.3      | 21.3     |
| B3LYP-D3/6-31+G(d,p)       | 2519.9 | -84.6      | 881.8 | -3.6       | 793.5 | -1.5       | 43.0     |
| B3LYP-D3/6-31++G(d,p)      | 2532.2 | -72.3      | 879.7 | -5.7       | 792.1 | -2.9       | 41.8     |
| B3LYP-D3/6-311G(d,p)       | 2766.8 | 162.3      | 866.3 | -19.1      | 765.5 | -29.5      | 21.6     |
| B3LYP-D3/6-311+G(d,p)      | 2602.0 | -2.5       | 873.3 | -12.1      | 786.5 | -8.5       | 35.7     |
| B3LYP-D3/6-311++G(d,p)     | 2604.6 | 0.1        | 873.1 | -12.3      | 786.2 | -8.8       | 35.6     |
| B3LYP-D3/6-311G(2d,2p)     | 2739.0 | 134.5      | 869.7 | -15.7      | 773.0 | -22.0      | 24.9     |
| B3LYP-D3/6-311+G(2d,2p)    | 2622.6 | 18.1       | 874.8 | -10.6      | 787.1 | -7.9       | 35.0     |
| B3LYP-D3/6-311++G(2d,2p)   | 2624.8 | 20.3       | 874.6 | -10.8      | 786.8 | -8.2       | 34.8     |
| B3LYP-D3/6-311G(df,pd)     | 2775.3 | 170.8      | 868.3 | -17.1      | 767.5 | -27.5      | 21.5     |
| B3LYP-D3/6-311+G(df,pd)    | 2593.6 | -10.9      | 877.3 | -8.1       | 790.7 | -4.3       | 37.3     |
| B3LYP-D3/6-311++G(df,pd)   | 2595.3 | -9.2       | 877.2 | -8.2       | 790.5 | -4.5       | 37.2     |
| B3LYP-D3/6-311G(2df,2pd)   | 2750.3 | 145.8      | 870.1 | -15.3      | 772.8 | -22.2      | 24.1     |
| B3LYP-D3/6-311+G(2df,2pd)  | 2626.7 | 22.2       | 875.3 | -10.1      | 787.9 | -7.1       | 34.7     |
| B3LYP-D3/6-311++G(2df,2pd) | 2626.9 | 22.4       | 875.3 | -10.1      | 787.8 | -7.2       | 34.8     |
| B3LYP-D3/6-311G(3df,3pd)   | 2720.1 | 115.6      | 871.4 | -14.0      | 777.0 | -18.0      | 26.6     |
| B3LYP-D3/6-311+G(3df,3pd)  | 2597.2 | -7.3       | 879.0 | -6.4       | 791.9 | -3.1       | 37.6     |
| B3LYP-D3/6-311++G(3df,3pd) | 2598.7 | -5.8       | 878.8 | -6.6       | 791.7 | -3.3       | 37.5     |
| B3LYP-D3/aug-cc-pVDZ       | 2615.4 | 10.9       | 871.4 | -14.0      | 783.9 | -11.1      | 34.4     |
| B3LYP-D3/cc-pVTZ           | 2680.5 | 76.0       | 871.3 | -14.1      | 781.1 | -13.9      | 30.1     |
| B3LYP-D3/aug-cc-pVTZ       | 2605.0 | 0.5        | 877.0 | -8.4       | 790.2 | -4.8       | 36.8     |
| B3LYP-D3BJ/6-31G(d,p)      | 2712.2 | 107.7      | 869.2 | -16.2      | 773.9 | -21.1      | 26.2     |
| B3LYP-D3BJ/6-31+G(d,p)     | 2460.4 | -144.1     | 898.1 | 12.7       | 802.0 | 7.0        | 50.2     |
| B3LYP-D3BJ/6-31++G(d,p)    | 2464.8 | -139.7     | 896.9 | 11.5       | 801.6 | 6.6        | 49.7     |
| B3LYP-D3BJ/6-311G(d,p)     | 2460.8 | -143.7     | 906.6 | 21.2       | 807.4 | 12.4       | 51.5     |
| B3LYP-D3BJ/6-311+G(d,p)    | 2518.2 | -86.3      | 887.9 | 2.5        | 798.4 | 3.4        | 44.4     |
| B3LYP-D3BJ/6-311++G(d,p)   | 2530.3 | -74.2      | 885.6 | 0.2        | 797.0 | 2.0        | 43.2     |
| B3LYP-D3BJ/6-311G(2d,2p)   | 2690.8 | 86.3       | 873.0 | -12.4      | 781.4 | -13.6      | 29.5     |
| B3LYP-D3BJ/6-311+G(2d,2p)  | 2567.3 | -37.2      | 883.6 | -1.8       | 795.7 | 0.7        | 40.6     |
| B3LYP-D3BJ/6-311++G(2d,2p) | 2571.5 | -33.0      | 882.9 | -2.5       | 795.2 | 0.2        | 40.3     |
| B3LYP-D3BJ/6-311G(df,pd)   | 2367.9 | -236.6     | 961.6 | 76.2       | 819.3 | 24.3       | 69.7     |
| B3LYP-D3BJ/6-311+G(df,pd)  | 2497.9 | -106.6     | 896.6 | 11.2       | 803.6 | 8.6        | 47.6     |
| B3LYP-D3BJ/6-311++G(df,pd) | 2508.5 | -96.0      | 894.1 | 8.7        | 802.5 | 7.5        | 46.5     |

|                              |        |        |       |       |       |       |      |
|------------------------------|--------|--------|-------|-------|-------|-------|------|
| B3LYP-D3BJ/6-311G(2df,2pd)   | 2703.2 | 98.7   | 873.1 | -12.3 | 781.0 | -14.0 | 28.6 |
| B3LYP-D3BJ/6-311+G(2df,2pd)  | 2570.7 | -33.8  | 884.0 | -1.4  | 796.5 | 1.5   | 40.4 |
| B3LYP-D3BJ/6-311++G(2df,2pd) | 2572.5 | -32.0  | 883.7 | -1.7  | 796.3 | 1.3   | 40.3 |
| B3LYP-D3BJ/6-311G(3df,3pd)   | 2677.3 | 72.8   | 874.7 | -10.7 | 784.5 | -10.5 | 30.7 |
| B3LYP-D3BJ/6-311+G(3df,3pd)  | 2523.3 | -81.2  | 893.5 | 8.1   | 802.4 | 7.4   | 45.4 |
| B3LYP-D3BJ/6-311++G(3df,3pd) | 2525.3 | -79.2  | 893.0 | 7.6   | 802.2 | 7.2   | 45.2 |
| B3LYP-D3BJ/cc-pVDZ           | 2775.3 | 170.8  | 865.3 | -20.1 | 764.1 | -30.9 | 20.7 |
| B3LYP-D3BJ/aug-cc-pVDZ       | 2560.6 | -43.9  | 879.7 | -5.7  | 792.6 | -2.4  | 40.0 |
| B3LYP-D3BJ/cc-pVTZ           | 2618.2 | 13.7   | 877.9 | -7.5  | 791.0 | -4.0  | 36.0 |
| B3LYP-D3BJ/aug-cc-pVTZ       | 2542.1 | -62.4  | 888.3 | 2.9   | 799.5 | 4.5   | 43.3 |
|                              |        |        |       |       |       |       |      |
| CAM-B3LYP-D3BJ/6-311G(d,p)   | 2802.0 | 197.5  | 874.1 | -11.3 | 771.4 | -23.6 | 20.8 |
| CAM-B3LYP-D3BJ/6-311+G(d,p)  | 2643.4 | 38.9   | 880.2 | -5.2  | 791.9 | -3.1  | 34.3 |
| CAM-B3LYP-D3BJ/aug-cc-pVDZ   | 2706.6 | 102.1  | 879.5 | -5.9  | 788.5 | -6.5  | 30.1 |
| CAM-B3LYP-D3BJ/aug-cc-pVTZ   | 2644.8 | 40.3   | 879.4 | -6.0  | 790.6 | -4.4  | 34.1 |
| CAM-B3LYP-D3BJ-cc-pVDZ       | 2644.5 | 40.0   | 880.2 | -5.2  | 791.8 | -3.2  | 34.3 |
| CAM-B3LYP-D3BJ/cc-pVTZ       | 2848.9 | 244.4  | 872.5 | -12.9 | 762.7 | -32.3 | 16.1 |
|                              |        |        |       |       |       |       |      |
| M06-2X/6-31G(d,p)            | 2840.6 | 236.1  | 877.0 | -8.4  | 767.0 | -28.0 | 17.1 |
| M06-2X/6-31+G(d,p)           | 2710.2 | 105.7  | 878.2 | -7.2  | 783.1 | -11.9 | 28.0 |
| M06-2X/6-31++G(d,p)          | 2712.9 | 108.4  | 878.0 | -7.4  | 782.7 | -12.3 | 27.8 |
| M06-2X/6-311G(d,p)           | 2832.2 | 227.7  | 876.7 | -8.7  | 769.5 | -25.5 | 18.3 |
| M06-2X/6-311+G(d,p)          | 2726.6 | 122.1  | 879.1 | -6.3  | 783.8 | -11.2 | 27.3 |
| M06-2X/6-311++G(d,p)         | 2726.1 | 121.6  | 879.1 | -6.3  | 783.8 | -11.2 | 27.4 |
| M06-2X/6-311G(df,pd)         | 2839.1 | 234.6  | 878.1 | -7.3  | 771.0 | -24.0 | 18.3 |
| M06-2X/6-311+G(df,pd)        | 2730.0 | 125.5  | 880.7 | -4.7  | 785.7 | -9.3  | 27.6 |
| M06-2X/6-311++G(df,pd)       | 2728.4 | 123.9  | 880.9 | -4.5  | 785.9 | -9.1  | 27.7 |
| M06-2X/6-311G(3df,3pd)       | 2787.6 | 183.1  | 880.8 | -4.6  | 780.1 | -14.9 | 23.2 |
| M06-2X/6-311+G(3df,3pd)      | 2729.8 | 125.3  | 881.9 | -3.5  | 787.3 | -7.7  | 28.3 |
| M06-2X/6-311++G(3df,3pd)     | 2729.9 | 125.4  | 881.9 | -3.5  | 787.3 | -7.7  | 28.3 |
| M06-2X/cc-pVDZ               | 2869.3 | 264.8  | 876.0 | -9.4  | 762.7 | -32.3 | 14.5 |
| M06-2X/aug-cc-pVDZ           | 2718.3 | 113.8  | 879.2 | -6.2  | 784.2 | -10.8 | 28.1 |
| M06-2X/cc-pVTZ               | 2753.1 | 148.6  | 880.6 | -4.8  | 784.2 | -10.8 | 26.2 |
| M06-2X/aug-cc-pVTZ           | 2714.5 | 110.0  | 882.1 | -3.3  | 789.1 | -5.9  | 29.7 |
|                              |        |        |       |       |       |       |      |
| MP2/6-31G(d,p)               | 2383.1 | -221.4 | 971.7 | 86.3  | 827.2 | 32.2  | 70.9 |
| MP2/6-31+G(d,p)              | 2412.1 | -192.4 | 937.2 | 51.8  | 819.0 | 24.0  | 61.5 |
| MP2/6-31++G(d,p)             | 2418.0 | -186.5 | 934.8 | 49.4  | 818.7 | 23.7  | 60.6 |
| MP2/6-311G(d,p)              | 2388.7 | -215.8 | 968.7 | 83.3  | 827.4 | 32.4  | 69.4 |
| MP2/6-311+G(d,p)             | 2465.6 | -138.9 | 918.3 | 32.9  | 815.0 | 20.0  | 53.0 |
| MP2/6-311++G(d,p)            | 2480.4 | -124.1 | 913.5 | 28.1  | 813.2 | 18.2  | 51.0 |
| MP2/6-311G(2d,2p)            | 2726.9 | 122.4  | 881.6 | -3.8  | 786.9 | -8.1  | 27.6 |
| MP2/6-311+G(2d,2p)           | 2611.6 | 7.1    | 889.9 | 4.5   | 800.4 | 5.4   | 37.9 |
| MP2/6-311++G(2d,2p)          | 2612.9 | 8.4    | 889.7 | 4.3   | 800.3 | 5.3   | 37.8 |
| MP2/6-311G(df,pd)            | 2412.1 | -192.4 | 973.1 | 87.7  | 833.4 | 38.4  | 68.5 |
| MP2/6-311+G(df,pd)           | 2471.3 | -133.2 | 930.1 | 44.7  | 822.1 | 27.1  | 55.1 |
| MP2/6-311++G(df,pd)          | 2481.1 | -123.4 | 926.5 | 41.1  | 820.9 | 25.9  | 53.8 |
| MP2/6-311G(2df,2pd)          | 2747.7 | 143.2  | 885.7 | 0.3   | 789.5 | -5.5  | 26.7 |
| MP2/6-311+G(2df,2pd)         | 2615.3 | 10.8   | 895.2 | 9.8   | 805.3 | 10.3  | 38.5 |
| MP2/6-311++G(2df,2pd)        | 2614.7 | 10.2   | 895.3 | 9.9   | 805.4 | 10.4  | 38.6 |
| MP2/6-311G(3df,3pd)          | 2709.9 | 105.4  | 887.2 | 1.8   | 793.7 | -1.3  | 29.6 |

|                               |               |        |              |       |              |       |      |
|-------------------------------|---------------|--------|--------------|-------|--------------|-------|------|
| MP2/6-311+G(3df,3pd)          | 2473.1        | -131.4 | 931.8        | 46.4  | 823.1        | 28.1  | 55.5 |
| MP2/6-311++G(3df,3pd)         | 2472.4        | -132.1 | 932.0        | 46.6  | 823.2        | 28.2  | 55.5 |
| MP2/cc-pVDZ                   | 2746.1        | 141.6  | 871.4        | -14.0 | 772.4        | -22.6 | 23.1 |
| MP2/aug-cc-pVDZ               | 2387.5        | -217.0 | 948.7        | 63.3  | 820.2        | 25.2  | 65.7 |
| MP2/cc-pVTZ                   | 2628.7        | 24.2   | 891.7        | 6.3   | 802.3        | 7.3   | 37.1 |
| MP2/aug-cc-pVTZ               | 2501.1        | -103.4 | 917.9        | 32.5  | 817.6        | 22.6  | 50.8 |
| $\omega$ B97X-D/6-311G(d,p)   | 2599.5        | -5.0   | 883.2        | -2.2  | 795.7        | 0.7   | 37.8 |
| $\omega$ B97X-D/6-311+G(d,p)  | 2602.2        | -2.3   | 882.9        | -2.5  | 795.3        | 0.3   | 37.6 |
| $\omega$ B97X-D/6-311++G(d,p) | 2473.4        | -131.1 | 913.2        | 27.8  | 812.6        | 17.6  | 51.6 |
| $\omega$ B97XD/aug-cc-pVDZ    | 2606.4        | 1.9    | 880.7        | -4.7  | 792.9        | -2.1  | 36.8 |
| $\omega$ B97XD/aug-cc-pVTZ    | 2600.1        | -4.4   | 886.7        | 1.3   | 799.1        | 4.1   | 39.0 |
| $\omega$ B97XD/cc-pVDZ        | 2781.9        | 177.4  | 870.0        | -15.4 | 769.0        | -26.0 | 21.3 |
| $\omega$ B97XD/cc-pVTZ        | 2657.1        | 52.6   | 880.5        | -4.9  | 792.3        | -2.7  | 33.7 |
| <b>Expt.</b>                  | <b>2604.5</b> |        | <b>885.4</b> |       | <b>795.0</b> |       |      |

**Table S-9.** The rotational constants  $A$ ,  $B$ ,  $C$  (in MHz) of the  $C_1$  conformer of ethyl 2-methylpentanoate calculated at different levels of theory and their deviations to the experimental values (calc.-exp.)  $\Delta A$ ,  $\Delta B$ , and  $\Delta C$ , respectively (in MHz). The  $\Theta$  angle (in degree) is also given.

| Level of theory            | $A$    | $\Delta A$ | $B$   | $\Delta B$ | $C$   | $\Delta C$ | $\Theta$ |
|----------------------------|--------|------------|-------|------------|-------|------------|----------|
| B3LYP-D3/6-31G(d,p)        | 1473.4 | -533.8     | 819.4 | 165.3      | 604.8 | 38.4       | 77.4     |
| B3LYP-D3/6-31+G(d,p)       | 1830.8 | -176.4     | 673.4 | 19.3       | 571.0 | 4.6        | 47.3     |
| B3LYP-D3/6-31++G(d,p)      | 1829.1 | -178.1     | 673.9 | 19.8       | 571.1 | 4.7        | 47.4     |
| B3LYP-D3/6-311G(d,p)       | 1513.2 | -494.0     | 795.8 | 141.7      | 601.2 | 34.8       | 73.5     |
| B3LYP-D3/6-311+G(d,p)      | 2040.8 | 33.6       | 638.8 | -15.3      | 558.3 | -8.1       | 35.1     |
| B3LYP-D3/6-311++G(d,p)     | 2039.8 | 32.6       | 639.0 | -15.1      | 558.3 | -8.1       | 35.2     |
| B3LYP-D3/6-311G(2d,2p)     | 1560.7 | -446.5     | 775.7 | 121.6      | 599.0 | 32.6       | 69.2     |
| B3LYP-D3/6-311+G(2d,2p)    | 2054.6 | 47.4       | 639.9 | -14.2      | 559.2 | -7.2       | 34.8     |
| B3LYP-D3/6-311++G(2d,2p)   | 2055.9 | 48.7       | 639.8 | -14.3      | 559.1 | -7.3       | 34.7     |
| B3LYP-D3/6-311G(df,pd)     | 1527.6 | -479.6     | 792.6 | 138.5      | 602.2 | 35.8       | 72.4     |
| B3LYP-D3/6-311+G(df,pd)    | 2013.5 | 6.3        | 645.2 | -8.9       | 562.0 | -4.4       | 37.0     |
| B3LYP-D3/6-311++G(df,pd)   | 2009.0 | 1.8        | 646.0 | -8.1       | 562.3 | -4.1       | 37.3     |
| B3LYP-D3/6-311G(2df,2pd)   | 1551.7 | -455.5     | 781.5 | 127.4      | 600.6 | 34.2       | 70.3     |
| B3LYP-D3/6-311+G(2df,2pd)  | 2062.4 | 55.2       | 639.7 | -14.4      | 559.6 | -6.8       | 34.5     |
| B3LYP-D3/6-311++G(2df,2pd) | 2061.8 | 54.6       | 639.8 | -14.3      | 559.6 | -6.8       | 34.5     |
| B3LYP-D3/6-311G(3df,3pd)   | 2216.7 | 209.5      | 624.1 | -30.0      | 550.3 | -16.1      | 26.0     |
| B3LYP-D3/6-311+G(3df,3pd)  | 1985.6 | -21.6      | 651.1 | -3.0       | 564.8 | -1.6       | 38.8     |
| B3LYP-D3/6-311++G(3df,3pd) | 1991.3 | -15.9      | 650.2 | -3.9       | 564.5 | -1.9       | 38.5     |
| B3LYP-D3/cc-pVDZ           | 1445.1 | -562.1     | 837.1 | 183.0      | 605.7 | 39.3       | 81.9     |
| B3LYP-D3/aug-cc-pVDZ       | 2068.2 | 61.0       | 634.9 | -19.2      | 556.2 | -10.2      | 33.4     |
| B3LYP-D3/cc-pVTZ           | 2160.0 | 152.8      | 628.2 | -25.9      | 553.3 | -13.1      | 29.3     |
| B3LYP-D3/aug-cc-pVTZ       | 2019.3 | 12.1       | 645.3 | -8.8       | 562.2 | -4.2       | 36.9     |
| B3LYP-D3BJ/6-31G(d,p)      | 1510.9 | -496.3     | 799.8 | 145.7      | 603.3 | 36.9       | 73.3     |
| B3LYP-D3BJ/6-31+G(d,p)     | 1749.5 | -257.7     | 696.2 | 42.1       | 578.6 | 12.2       | 52.9     |
| B3LYP-D3BJ/6-31++G(d,p)    | 1744.7 | -262.5     | 697.6 | 43.5       | 579.0 | 12.6       | 53.3     |

|                              |        |        |       |       |       |       |      |
|------------------------------|--------|--------|-------|-------|-------|-------|------|
| B3LYP-D3BJ/6-311G(d,p)       | 1548.8 | -458.4 | 779.6 | 125.5 | 599.6 | 33.2  | 70.0 |
| B3LYP-D3BJ/6-311+G(d,p)      | 1857.0 | -150.2 | 672.5 | 18.4  | 572.3 | 5.9   | 46.0 |
| B3LYP-D3BJ/6-311++G(d,p)     | 1866.6 | -140.6 | 670.5 | 16.4  | 571.6 | 5.2   | 45.5 |
| B3LYP-D3BJ/6-311G(2d,2p)     | 1614.1 | -393.1 | 754.4 | 100.3 | 596.0 | 29.6  | 64.4 |
| B3LYP-D3BJ/6-311+G(2d,2p)    | 1926.5 | -80.7  | 662.1 | 8.0   | 569.3 | 2.9   | 42.2 |
| B3LYP-D3BJ/6-311++G(2d,2p)   | 1930.8 | -76.4  | 661.3 | 7.2   | 568.9 | 2.5   | 42.0 |
| B3LYP-D3BJ/6-311G(df,pd)     | 1561.4 | -445.8 | 777.9 | 123.8 | 600.7 | 34.3  | 69.2 |
| B3LYP-D3BJ/6-311+G(df,pd)    | 1825.4 | -181.8 | 682.9 | 28.8  | 576.6 | 10.2  | 48.4 |
| B3LYP-D3BJ/6-311++G(df,pd)   | 1833.7 | -173.5 | 681.0 | 26.9  | 576.0 | 9.6   | 47.9 |
| B3LYP-D3BJ/6-311G(2df,2pd)   | 1604.4 | -402.8 | 759.6 | 105.5 | 597.7 | 31.3  | 65.4 |
| B3LYP-D3BJ/6-311+G(2df,2pd)  | 1932.9 | -74.3  | 661.7 | 7.6   | 569.7 | 3.3   | 41.9 |
| B3LYP-D3BJ/6-311++G(2df,2pd) | 1936.5 | -70.7  | 661.1 | 7.0   | 569.4 | 3.0   | 41.8 |
| B3LYP-D3BJ/6-311G(3df,3pd)   | 2141.5 | 134.3  | 632.8 | -21.3 | 556.4 | -10.0 | 30.3 |
| B3LYP-D3BJ/6-311+G(3df,3pd)  | 1841.4 | -165.8 | 681.1 | 27.0  | 576.5 | 10.1  | 47.6 |
| B3LYP-D3BJ/6-311++G(3df,3pd) | 1845.0 | -162.2 | 680.3 | 26.2  | 576.3 | 9.9   | 47.4 |
| B3LYP-D3BJ/cc-pVDZ           | 1474.8 | -532.4 | 820.1 | 166.0 | 605.0 | 38.6  | 78.2 |
| B3LYP-D3BJ/aug-cc-pVDZ       | 1925.0 | -82.2  | 658.7 | 4.6   | 567.3 | 0.9   | 41.6 |
| B3LYP-D3BJ/cc-pVTZ           | 2036.3 | 29.1   | 644.8 | -9.3  | 562.7 | -3.7  | 36.1 |
| B3LYP-D3BJ/aug-cc-pVTZ       | 1883.9 | -123.3 | 670.9 | 16.8  | 572.9 | 6.5   | 44.9 |
|                              |        |        |       |       |       |       |      |
| CAM-B3LYP-D3BJ/6-311G(d,p)   | 1545.9 | -461.3 | 794.7 | 140.6 | 605.7 | 39.3  | 71.9 |
| CAM-B3LYP-D3BJ/6-311+G(d,p)  | 2082.6 | 75.4   | 642.1 | -12.0 | 562.1 | -4.3  | 33.8 |
| CAM-B3LYP-D3BJ/aug-cc-pVDZ   | 2173.4 | 166.2  | 635.1 | -19.0 | 559.1 | -7.3  | 29.6 |
| CAM-B3LYP-D3BJ/aug-cc-pVTZ   | 2072.6 | 65.4   | 643.2 | -10.9 | 562.4 | -4.0  | 34.2 |
| CAM-B3LYP-D3BJ-cc-pVDZ       | 2079.4 | 72.2   | 642.6 | -11.5 | 562.4 | -4.0  | 34.0 |
| CAM-B3LYP-D3BJ/cc-pVTZ       | 1475.9 | -531.3 | 834.0 | 179.9 | 609.9 | 43.5  | 80.1 |
|                              |        |        |       |       |       |       |      |
| M06-2X/6-31G(d,p)            | 1484.6 | -522.6 | 840.6 | 186.5 | 616.7 | 50.3  | 77.8 |
| M06-2X/6-31+G(d,p)           | 1555.5 | -451.7 | 792.0 | 137.9 | 607.0 | 40.6  | 70.0 |
| M06-2X/6-31++G(d,p)          | 1554.9 | -452.3 | 792.4 | 138.3 | 607.1 | 40.7  | 70.1 |
| M06-2X/6-311G(d,p)           | 1502.7 | -504.5 | 829.8 | 175.7 | 615.3 | 48.9  | 76.0 |
| M06-2X/6-311+G(d,p)          | 1546.4 | -460.8 | 800.7 | 146.6 | 609.6 | 43.2  | 71.0 |
| M06-2X/6-311++G(d,p)         | 1548.0 | -459.2 | 799.9 | 145.8 | 609.5 | 43.1  | 70.9 |
| M06-2X/6-311G(df,pd)         | 1510.2 | -497.0 | 829.1 | 175.0 | 616.3 | 49.9  | 75.4 |
| M06-2X/6-311+G(df,pd)        | 1559.2 | -448.0 | 797.2 | 143.1 | 609.9 | 43.5  | 70.1 |
| M06-2X/6-311++G(df,pd)       | 1559.9 | -447.3 | 796.8 | 142.7 | 609.8 | 43.4  | 70.0 |
| M06-2X/6-311G(3df,3pd)       | 1548.0 | -459.2 | 808.5 | 154.4 | 613.1 | 46.7  | 71.9 |
| M06-2X/6-311+G(3df,3pd)      | 1579.3 | -427.9 | 789.2 | 135.1 | 608.7 | 42.3  | 68.5 |
| M06-2X/6-311++G(3df,3pd)     | 1580.5 | -426.7 | 788.6 | 134.5 | 608.5 | 42.1  | 68.4 |
| M06-2X/cc-pVDZ               | 1468.7 | -538.5 | 850.7 | 196.6 | 616.8 | 50.4  | 80.7 |
| M06-2X/aug-cc-pVDZ           | 1535.3 | -471.9 | 808.4 | 154.3 | 612.1 | 45.7  | 71.8 |
| M06-2X/cc-pVTZ               | 1561.5 | -445.7 | 798.8 | 144.7 | 610.8 | 44.4  | 70.3 |
| M06-2X/aug-cc-pVTZ           | 1606.8 | -400.4 | 775.0 | 120.9 | 605.6 | 39.2  | 66.0 |
|                              |        |        |       |       |       |       |      |
| MP2/6-31G(d,p)               | 1534.5 | -472.7 | 802.8 | 148.7 | 609.6 | 43.2  | 72.0 |
| MP2/6-31+G(d,p)              | 1602.3 | -404.9 | 762.7 | 108.6 | 599.9 | 33.5  | 65.4 |
| MP2/6-31++G(d,p)             | 1611.5 | -395.7 | 758.7 | 104.6 | 599.1 | 32.7  | 64.5 |
| MP2/6-311G(d,p)              | 1551.4 | -455.8 | 794.6 | 140.5 | 608.0 | 41.6  | 70.1 |
| MP2/6-311+G(d,p)             | 1660.6 | -346.6 | 741.4 | 87.3  | 595.5 | 29.1  | 60.1 |
| MP2/6-311++G(d,p)            | 1680.9 | -326.3 | 734.0 | 79.9  | 593.6 | 27.2  | 58.4 |
| MP2/6-311G(2d,2p)            | 1559.1 | -448.1 | 798.1 | 144.0 | 610.7 | 44.3  | 70.0 |

|                               |               |        |              |       |              |      |      |
|-------------------------------|---------------|--------|--------------|-------|--------------|------|------|
| MP2/6-311+G(2d,2p)            | 1958.3        | -48.9  | 666.9        | 12.8  | 573.8        | 7.4  | 40.4 |
| MP2/6-311++G(2d,2p)           | 1958.9        | -48.3  | 666.7        | 12.6  | 573.7        | 7.3  | 40.4 |
| MP2/6-311G(df,pd)             | 1572.2        | -435.0 | 795.8        | 141.7 | 611.7        | 45.3 | 69.1 |
| MP2/6-311+G(df,pd)            | 1690.7        | -316.5 | 740.0        | 85.9  | 597.9        | 31.5 | 58.6 |
| MP2/6-311++G(df,pd)           | 1704.4        | -302.8 | 735.3        | 81.2  | 596.7        | 30.3 | 57.5 |
| MP2/6-311G(2df,2pd)           | 1566.2        | -441.0 | 801.0        | 146.9 | 613.2        | 46.8 | 70.1 |
| MP2/6-311+G(2df,2pd)          | 1964.3        | -42.9  | 670.3        | 16.2  | 576.6        | 10.2 | 40.7 |
| MP2/6-311++G(2df,2pd)         | 1961.8        | -45.4  | 670.6        | 16.5  | 576.8        | 10.4 | 40.8 |
| MP2/6-311G(3df,3pd)           | 1604.5        | -402.7 | 780.8        | 126.7 | 609.5        | 43.1 | 66.0 |
| MP2/6-311+G(3df,3pd)          | 1693.5        | -313.7 | 741.1        | 87.0  | 599.1        | 32.7 | 58.3 |
| MP2/6-311++G(3df,3pd)         | 1693.3        | -313.9 | 741.2        | 87.1  | 599.1        | 32.7 | 58.3 |
| MP2/cc-pVDZ                   | 1488.9        | -518.3 | 819.8        | 165.7 | 608.8        | 42.4 | 76.4 |
| MP2/aug-cc-pVDZ               | 1560.2        | -447.0 | 779.6        | 125.5 | 603.6        | 37.2 | 67.2 |
| MP2/cc-pVTZ                   | 1650.2        | -357.0 | 756.2        | 102.1 | 602.1        | 35.7 | 62.1 |
| MP2/aug-cc-pVTZ               | 1689.6        | -317.6 | 740.5        | 86.4  | 598.5        | 32.1 | 58.5 |
| $\omega$ B97X-D/6-311G(d,p)   | 1645.4        | -361.8 | 743.7        | 89.6  | 594.7        | 28.3 | 61.8 |
| $\omega$ B97X-D/6-311+G(d,p)  | 1647.3        | -359.9 | 742.9        | 88.8  | 594.5        | 28.1 | 61.7 |
| $\omega$ B97X-D/6-311++G(d,p) | 1532.0        | -475.2 | 799.6        | 145.5 | 606.3        | 39.9 | 72.5 |
| $\omega$ B97XD/aug-cc-pVDZ    | 1671.0        | -336.2 | 732.8        | 78.7  | 592.0        | 25.6 | 59.3 |
| $\omega$ B97XD/aug-cc-pVTZ    | 1993.7        | -13.5  | 656.4        | 2.3   | 569.2        | 2.8  | 39.3 |
| $\omega$ B97XD/cc-pVDZ        | 1480.7        | -526.5 | 826.4        | 172.3 | 608.8        | 42.4 | 78.2 |
| $\omega$ B97XD/cc-pVTZ        | 1648.8        | -358.4 | 747.8        | 93.7  | 597.2        | 30.8 | 62.1 |
| <b>Expt.</b>                  | <b>2007.2</b> |        | <b>654.1</b> |       | <b>566.4</b> |      |      |
